# Supplementary material
Source: PubMed Central journal article supplement (PMC3210881)
Supplement: NIHMS326674-supplement-1.pdf [file NIHMS326674-supplement-1.pdf]

**Table S1. Distribution of SNP genotypes in cases and controls, by race**

| Gene                            | SNP        | Major/minor allele | Genotype | European-Americans |         |                   |         | African-Americans |         |                  |         |
|---------------------------------|------------|--------------------|----------|--------------------|---------|-------------------|---------|-------------------|---------|------------------|---------|
|                                 |            |                    |          | Cases (n=922)      |         | Controls (n=1074) |         | Cases (n=305)     |         | Controls (n=251) |         |
|                                 |            |                    |          | n                  | (col %) | n                 | (col %) | n                 | (col %) | n                | (col %) |
| <b>ALCOHOL METABOLISM GENES</b> |            |                    |          |                    |         |                   |         |                   |         |                  |         |
| <i>ADH1B</i>                    | rs12507573 | C/A                | AA       | 188                | 20.4%   | 234               | 21.8%   | 56                | 18.4%   | 40               | 15.9%   |
|                                 |            |                    | AC       | 462                | 50.1%   | 536               | 49.9%   | 149               | 48.9%   | 127              | 50.6%   |
|                                 |            |                    | CC       | 272                | 29.5%   | 304               | 28.3%   | 100               | 32.8%   | 83               | 33.1%   |
|                                 |            |                    | missing  | 0                  | 0.0%    | 0                 | 0.0%    | 0                 | 0.0%    | 1                | 0.4%    |
|                                 | rs1042026  | A/G                | GG       | 73                 | 7.9%    | 81                | 7.5%    | 3                 | 1.0%    | 5                | 2.0%    |
|                                 |            |                    | GA       | 382                | 41.4%   | 457               | 42.6%   | 54                | 17.7%   | 36               | 14.3%   |
|                                 |            |                    | AA       | 467                | 50.7%   | 536               | 49.9%   | 248               | 81.3%   | 210              | 83.7%   |
|                                 |            |                    | missing  | 0                  | 0.0%    | 0                 | 0.0%    | 0                 | 0.0%    | 0                | 0.0%    |
|                                 | rs7673353  | C/T                | TT       | 0                  | 0.0%    | 0                 | 0.0%    | 7                 | 2.3%    | 12               | 4.8%    |
|                                 |            |                    | TC       | 3                  | 0.3%    | 6                 | 0.6%    | 89                | 29.2%   | 65               | 25.9%   |
|                                 |            |                    | CC       | 919                | 99.7%   | 1068              | 99.4%   | 209               | 68.5%   | 174              | 69.3%   |
|                                 |            |                    | missing  | 0                  | 0.0%    | 0                 | 0.0%    | 0                 | 0.0%    | 0                | 0.0%    |
|                                 | rs17028834 | T/C                | CC       | 1                  | 0.1%    | 0                 | 0.0%    | 2                 | 0.7%    | 5                | 2.0%    |
|                                 |            |                    | CT       | 3                  | 0.3%    | 2                 | 0.2%    | 80                | 26.2%   | 50               | 19.9%   |
|                                 |            |                    | TT       | 918                | 99.6%   | 1072              | 99.8%   | 223               | 73.1%   | 196              | 78.1%   |
|                                 |            |                    | missing  | 0                  | 0.0%    | 0                 | 0.0%    | 0                 | 0.0%    | 0                | 0.0%    |
| rs1693457                       | T/C        | CC                 | 27       | 2.9%               | 27      | 2.5%              | 9       | 3.0%              | 16      | 6.4%             |         |
|                                 |            | CT                 | 297      | 32.2%              | 333     | 31.0%             | 88      | 28.9%             | 86      | 34.3%            |         |
|                                 |            | TT                 | 597      | 64.8%              | 714     | 66.5%             | 208     | 68.2%             | 148     | 59.0%            |         |
|                                 |            | missing            | 1        | 0.1%               | 0       | 0.0%              | 0       | 0.0%              | 1       | 0.4%             |         |
| rs1229984                       | G/A        | AA                 | 0        | 0.0%               | 3       | 0.3%              | 0       | 0.0%              | 0       | 0.0%             |         |
|                                 |            | AG                 | 30       | 3.3%               | 71      | 6.6%              | 1       | 0.3%              | 5       | 2.0%             |         |
|                                 |            | GG                 | 892      | 96.7%              | 1000    | 93.1%             | 304     | 99.7%             | 246     | 98.0%            |         |
|                                 |            | missing            | 0        | 0.0%               | 0       | 0.0%              | 0       | 0.0%              | 0       | 0.0%             |         |
| rs1159918                       | G/T        | TT                 | 129      | 14.0%              | 138     | 12.8%             | 161     | 52.8%             | 140     | 55.8%            |         |
|                                 |            | TG                 | 419      | 45.4%              | 485     | 45.2%             | 116     | 38.0%             | 93      | 37.1%            |         |
|                                 |            | GG                 | 374      | 40.6%              | 451     | 42.0%             | 28      | 9.2%              | 18      | 7.2%             |         |
|                                 |            | missing            | 0        | 0.0%               | 0       | 0.0%              | 0       | 0.0%              | 0       | 0.0%             |         |
| rs1229982                       | G/T        | TT                 | 30       | 3.3%               | 45      | 4.2%              | 69      | 22.6%             | 51      | 20.3%            |         |
|                                 |            | TG                 | 282      | 30.6%              | 327     | 30.4%             | 146     | 47.9%             | 125     | 49.8%            |         |
|                                 |            | GG                 | 610      | 66.2%              | 702     | 65.4%             | 90      | 29.5%             | 75      | 29.9%            |         |
|                                 |            | missing            | 0.0%     | 0                  | 0.0%    | 0                 | 0.0%    | 0.0%              | 0       | 0.0%             |         |
| <i>ADH1C</i>                    | rs2298753  | T/C                | CC       | 15                 | 1.6%    | 15                | 1.4%    | 0                 | 0.0%    | 0                | 0.0%    |
|                                 |            |                    | CT       | 186                | 20.2%   | 177               | 16.5%   | 20                | 6.6%    | 14               | 5.6%    |
|                                 |            |                    | TT       | 721                | 78.2%   | 882               | 82.1%   | 285               | 93.4%   | 237              | 94.4%   |
|                                 |            |                    | missing  | 0                  | 0.0%    | 0                 | 0.0%    | 0                 | 0.0%    | 0                | 0.0%    |
|                                 | rs1614972  | C/T                | TT       | 73                 | 7.9%    | 96                | 8.9%    | 67                | 22.0%   | 67               | 26.7%   |
|                                 |            |                    | TC       | 403                | 43.7%   | 446               | 41.5%   | 144               | 47.2%   | 129              | 51.4%   |
|                                 |            |                    | CC       | 446                | 48.4%   | 532               | 49.5%   | 94                | 30.8%   | 55               | 21.9%   |
|                                 |            |                    | missing  | 0                  | 0.0%    | 0                 | 0.0%    | 0                 | 0.0%    | 0                | 0.0%    |
|                                 | rs1391088  | C/A                | AA       | 3                  | 0.3%    | 4                 | 0.4%    | 2                 | 0.7%    | 2                | 0.8%    |
|                                 |            |                    | AC       | 118                | 12.8%   | 161               | 15.0%   | 55                | 18.0%   | 36               | 14.3%   |
|                                 |            |                    | CC       | 801                | 86.9%   | 909               | 84.6%   | 248               | 81.3%   | 213              | 84.9%   |
|                                 |            |                    | missing  | 0                  | 0.0%    | 0                 | 0.0%    | 0                 | 0.0%    | 0                | 0.0%    |
|                                 | rs1693482  | C/T                | TT       | 158                | 17.1%   | 172               | 16.0%   | 6                 | 2.0%    | 4                | 1.6%    |
|                                 |            |                    | TC       | 437                | 47.4%   | 497               | 46.3%   | 94                | 30.8%   | 64               | 25.5%   |
|                                 |            |                    | CC       | 325                | 35.2%   | 403               | 37.5%   | 205               | 67.2%   | 183              | 72.9%   |
|                                 |            |                    | missing  | 2                  | 0.2%    | 2                 | 0.2%    | 0                 | 0.0%    | 0                | 0.0%    |
| rs1631460                       | C/G        | GG                 | 160      | 17.4%              | 173     | 16.1%             | 6       | 2.0%              | 4       | 1.6%             |         |
|                                 |            | GC                 | 443      | 48.0%              | 508     | 47.3%             | 95      | 31.1%             | 65      | 25.9%            |         |
|                                 |            | CC                 | 318      | 34.5%              | 393     | 36.6%             | 204     | 66.9%             | 182     | 72.5%            |         |
|                                 |            | missing            | 1        | 0.1%               | 0       | 0.0%              | 0       | 0.0%              | 0       | 0.0%             |         |
| rs11936869                      | C/G        | GG                 | 64       | 6.9%               | 69      | 6.4%              | 53      | 17.4%             | 56      | 22.3%            |         |
|                                 |            | GC                 | 354      | 38.4%              | 430     | 40.0%             | 143     | 46.9%             | 122     | 48.6%            |         |
|                                 |            | CC                 | 504      | 54.7%              | 575     | 53.5%             | 109     | 35.7%             | 72      | 28.7%            |         |
|                                 |            | missing            | 0        | 0.0%               | 0       | 0.0%              | 0       | 0.0%              | 1       | 0.4%             |         |

**Table S1. Distribution of SNP genotypes in cases and controls, by race**

| Gene      | SNP        | Major/minor allele | Genotype | European-Americans |         |                   |         | African-Americans |         |                  |         |
|-----------|------------|--------------------|----------|--------------------|---------|-------------------|---------|-------------------|---------|------------------|---------|
|           |            |                    |          | Cases (n=922)      |         | Controls (n=1074) |         | Cases (n=305)     |         | Controls (n=251) |         |
|           |            |                    |          | n                  | (col %) | n                 | (col %) | n                 | (col %) | n                | (col %) |
| ADH4      | rs29001227 | A/T                | TT       | 1                  | 0.1%    | 1                 | 0.1%    | 8                 | 2.6%    | 8                | 3.2%    |
|           |            |                    | TA       | 4                  | 0.4%    | 1                 | 0.1%    | 92                | 30.2%   | 59               | 23.5%   |
|           |            |                    | AA       | 917                | 99.5%   | 1072              | 99.8%   | 205               | 67.2%   | 184              | 73.3%   |
|           |            |                    | missing  | 0                  | 0.0%    | 0                 | 0.0%    | 0                 | 0.0%    | 0                | 0.0%    |
|           | rs1126672  | C/T                | TT       | 53                 | 5.7%    | 82                | 7.6%    | 6                 | 2.0%    | 2                | 0.8%    |
|           |            |                    | TC       | 386                | 41.9%   | 434               | 40.4%   | 60                | 19.7%   | 46               | 18.3%   |
|           |            |                    | CC       | 483                | 52.4%   | 558               | 52.0%   | 239               | 78.4%   | 203              | 80.9%   |
|           |            |                    | missing  | 0                  | 0.0%    | 0                 | 0.0%    | 0                 | 0.0%    | 0                | 0.0%    |
|           | rs4699710  | T/C                | CC       | 70                 | 7.6%    | 98                | 9.1%    | 13                | 4.3%    | 5                | 2.0%    |
|           |            |                    | CT       | 412                | 44.7%   | 458               | 42.6%   | 90                | 29.5%   | 78               | 31.1%   |
|           |            |                    | TT       | 440                | 47.7%   | 518               | 48.2%   | 202               | 66.2%   | 168              | 66.9%   |
|           |            |                    | missing  | 0                  | 0.0%    | 0                 | 0.0%    | 0                 | 0.0%    | 0                | 0.0%    |
|           | rs10017466 | T/C                | CC       | 72                 | 7.8%    | 99                | 9.2%    | 40                | 13.1%   | 32               | 12.7%   |
|           |            |                    | CT       | 414                | 44.9%   | 459               | 42.7%   | 143               | 46.9%   | 101              | 40.2%   |
|           |            |                    | TT       | 436                | 47.3%   | 516               | 48.0%   | 121               | 39.7%   | 118              | 47.0%   |
|           |            |                    | missing  | 0                  | 0.0%    | 0                 | 0.0%    | 1                 | 0.3%    | 0                | 0.0%    |
| rs1800759 | C/A        | AA                 | 114      | 12.4%              | 150     | 14.0%             | 171     | 56.1%             | 152     | 60.6%            |         |
|           |            | AC                 | 472      | 51.2%              | 527     | 49.1%             | 113     | 37.0%             | 83      | 33.1%            |         |
|           |            | CC                 | 336      | 36.4%              | 397     | 37.0%             | 21      | 6.9%              | 16      | 6.4%             |         |
|           |            | missing            | 0        | 0.0%               | 0       | 0.0%              | 0       | 0.0%              | 0       | 0.0%             |         |
| rs1800761 | G/A        | AA                 | 31       | 3.4%               | 28      | 2.6%              | 26      | 8.5%              | 22      | 8.8%             |         |
|           |            | AG                 | 293      | 31.8%              | 343     | 31.9%             | 124     | 40.7%             | 100     | 39.8%            |         |
|           |            | GG                 | 598      | 64.9%              | 703     | 65.5%             | 155     | 50.8%             | 129     | 51.4%            |         |
|           |            | missing            | 0        | 0.0%               | 0       | 0.0%              | 0       | 0.0%              | 0       | 0.0%             |         |
| rs3762894 | T/C        | CC                 | 25       | 2.7%               | 20      | 1.9%              | 14      | 4.6%              | 17      | 6.8%             |         |
|           |            | CT                 | 247      | 26.8%              | 306     | 28.5%             | 99      | 32.5%             | 73      | 29.1%            |         |
|           |            | TT                 | 650      | 70.5%              | 748     | 69.6%             | 192     | 63.0%             | 161     | 64.1%            |         |
|           |            | missing            | 0        | 0.0%               | 0       | 0.0%              | 0       | 0.0%              | 0       | 0.0%             |         |
| ADH7      | rs284787   | C/T                | TT       | 61                 | 6.6%    | 58                | 5.4%    | 6                 | 2.0%    | 6                | 2.4%    |
|           |            |                    | TC       | 339                | 36.8%   | 384               | 35.8%   | 78                | 25.6%   | 57               | 22.7%   |
|           |            |                    | CC       | 522                | 56.6%   | 632               | 58.8%   | 221               | 72.5%   | 188              | 74.9%   |
|           |            |                    | missing  | 0                  | 0.0%    | 0                 | 0.0%    | 0                 | 0.0%    | 0                | 0.0%    |
|           | rs894369   | C/G                | GG       | 32                 | 3.5%    | 43                | 4.0%    | 7                 | 2.3%    | 6                | 2.4%    |
|           |            |                    | GC       | 275                | 29.8%   | 356               | 33.1%   | 77                | 25.2%   | 68               | 27.1%   |
|           |            |                    | CC       | 615                | 66.7%   | 675               | 62.8%   | 221               | 72.5%   | 176              | 70.1%   |
|           |            |                    | missing  | 0                  | 0.0%    | 0                 | 0.0%    | 0                 | 0.0%    | 1                | 0.4%    |
|           | rs17588403 | T/A                | AA       | 44                 | 4.8%    | 31                | 2.9%    | 4                 | 1.3%    | 3                | 1.2%    |
|           |            |                    | AT       | 274                | 29.7%   | 344               | 32.0%   | 66                | 21.6%   | 58               | 23.1%   |
|           |            |                    | TT       | 604                | 65.5%   | 699               | 65.1%   | 235               | 77.0%   | 190              | 75.7%   |
|           |            |                    | missing  | 0                  | 0.0%    | 0                 | 0.0%    | 0                 | 0.0%    | 0                | 0.0%    |
|           | rs1154454  | T/C                | CC       | 24                 | 2.6%    | 31                | 2.9%    | 49                | 16.1%   | 48               | 19.1%   |
|           |            |                    | CT       | 250                | 27.1%   | 309               | 28.8%   | 146               | 47.9%   | 128              | 51.0%   |
|           |            |                    | TT       | 648                | 70.3%   | 734               | 68.3%   | 110               | 36.1%   | 75               | 29.9%   |
|           |            |                    | missing  | 0                  | 0.0%    | 0                 | 0.0%    | 0                 | 0.0%    | 0                | 0.0%    |
| rs1154456 | T/C        | CC                 | 116      | 12.6%              | 127     | 11.8%             | 7       | 2.3%              | 7       | 2.8%             |         |
|           |            | CT                 | 438      | 47.5%              | 494     | 46.0%             | 87      | 28.5%             | 68      | 27.1%            |         |
|           |            | TT                 | 368      | 39.9%              | 453     | 42.2%             | 211     | 69.2%             | 176     | 70.1%            |         |
|           |            | missing            | 0        | 0.0%               | 0       | 0.0%              | 0       | 0.0%              | 0       | 0.0%             |         |
| rs1154460 | G/A        | AA                 | 194      | 21.0%              | 218     | 20.3%             | 66      | 21.6%             | 58      | 23.1%            |         |
|           |            | AG                 | 466      | 50.5%              | 544     | 50.7%             | 169     | 55.4%             | 127     | 50.6%            |         |
|           |            | GG                 | 259      | 28.1%              | 312     | 29.1%             | 70      | 23.0%             | 65      | 25.9%            |         |
|           |            | missing            | 3        | 0.3%               | 0       | 0.0%              | 0       | 0.0%              | 1       | 0.4%             |         |
| rs971074  | G/A        | AA                 | 7        | 0.8%               | 10      | 0.9%              | 8       | 2.6%              | 5       | 2.0%             |         |
|           |            | AG                 | 165      | 17.9%              | 210     | 19.6%             | 101     | 33.1%             | 70      | 27.9%            |         |
|           |            | GG                 | 750      | 81.3%              | 854     | 79.5%             | 196     | 64.3%             | 176     | 70.1%            |         |
|           |            | missing            | 0        | 0.0%               | 0       | 0.0%              | 0       | 0.0%              | 0       | 0.0%             |         |

**Table S1. Distribution of SNP genotypes in cases and controls, by race**

| Gene       | SNP       | Major/minor allele | Genotype | European-Americans |         |                   |         | African-Americans |         |                  |         |
|------------|-----------|--------------------|----------|--------------------|---------|-------------------|---------|-------------------|---------|------------------|---------|
|            |           |                    |          | Cases (n=922)      |         | Controls (n=1074) |         | Cases (n=305)     |         | Controls (n=251) |         |
|            |           |                    |          | n                  | (col %) | n                 | (col %) | n                 | (col %) | n                | (col %) |
| ALDH2      | rs1573496 | C/G                | GG       | 5                  | 0.5%    | 9                 | 0.8%    | 0                 | 0.0%    | 0                | 0.0%    |
|            |           |                    | GC       | 154                | 16.7%   | 190               | 17.7%   | 7                 | 2.3%    | 6                | 2.4%    |
|            |           |                    | CC       | 762                | 82.6%   | 875               | 81.5%   | 298               | 97.7%   | 245              | 97.6%   |
|            |           |                    | missing  | 1                  | 0.1%    | 0                 | 0.0%    | 0                 | 0.0%    | 0                | 0.0%    |
|            | rs4767939 | A/G                | GG       | 35                 | 3.8%    | 39                | 3.6%    | 52                | 17.0%   | 38               | 15.1%   |
|            |           |                    | GA       | 297                | 32.2%   | 315               | 29.3%   | 145               | 47.5%   | 125              | 49.8%   |
|            |           |                    | AA       | 589                | 63.9%   | 720               | 67.0%   | 108               | 35.4%   | 88               | 35.1%   |
|            |           |                    | missing  | 1                  | 0.1%    | 0                 | 0.0%    | 0                 | 0.0%    | 0                | 0.0%    |
|            | rs2238151 | T/C                | CC       | 119                | 12.9%   | 125               | 11.6%   | 257               | 84.3%   | 179              | 71.3%   |
|            |           |                    | CT       | 436                | 47.3%   | 464               | 43.2%   | 46                | 15.1%   | 71               | 28.3%   |
|            |           |                    | TT       | 363                | 39.4%   | 482               | 44.9%   | 2                 | 0.7%    | 1                | 0.4%    |
|            |           |                    | missing  | 4                  | 0.4%    | 3                 | 0.3%    | 0                 | 0.0%    | 0                | 0.0%    |
|            | rs7312055 | G/A                | AA       | 0                  | 0.0%    | 0                 | 0.0%    | 28                | 9.2%    | 12               | 4.8%    |
|            |           |                    | AG       | 5                  | 0.5%    | 8                 | 0.7%    | 111               | 36.4%   | 101              | 40.2%   |
|            |           |                    | GG       | 917                | 99.5%   | 1066              | 99.3%   | 166               | 54.4%   | 138              | 55.0%   |
|            |           |                    | missing  | 0                  | 0.0%    | 0                 | 0.0%    | 0                 | 0.0%    | 0                | 0.0%    |
| rs2158029  | G/A       | AA                 | 0        | 0.0%               | 0       | 0.0%              | 6       | 2.0%              | 1       | 0.4%             |         |
|            |           | AG                 | 6        | 0.7%               | 11      | 1.0%              | 45      | 14.8%             | 41      | 16.3%            |         |
|            |           | GG                 | 916      | 99.3%              | 1063    | 99.0%             | 254     | 83.3%             | 209     | 83.3%            |         |
|            |           | missing            | 0        | 0.0%               | 0       | 0.0%              | 0       | 0.0%              | 0       | 0.0%             |         |
| rs16941667 | C/T       | TT                 | 6        | 0.7%               | 5       | 0.5%              | 6       | 2.0%              | 4       | 1.6%             |         |
|            |           | TC                 | 153      | 16.6%              | 158     | 14.7%             | 74      | 24.3%             | 58      | 23.1%            |         |
|            |           | CC                 | 763      | 82.8%              | 911     | 84.8%             | 225     | 73.8%             | 188     | 74.9%            |         |
|            |           | missing            | 0        | 0.0%               | 0       | 0.0%              | 0       | 0.0%              | 1       | 0.4%             |         |
| rs16941669 | T/G       | GG                 | 14       | 1.5%               | 11      | 1.0%              | 2       | 0.7%              | 0       | 0.0%             |         |
|            |           | GT                 | 174      | 18.9%              | 190     | 17.7%             | 50      | 16.4%             | 36      | 14.3%            |         |
|            |           | TT                 | 734      | 79.6%              | 872     | 81.2%             | 253     | 83.0%             | 214     | 85.3%            |         |
|            |           | missing            | 0        | 0.0%               | 1       | 0.1%              | 0       | 0.0%              | 1       | 0.4%             |         |
| CYP2E1     | rs3813865 | G/C                | CC       | 0                  | 0.0%    | 1                 | 0.1%    | 4                 | 1.3%    | 3                | 1.2%    |
|            |           |                    | CG       | 45                 | 4.9%    | 49                | 4.6%    | 76                | 24.9%   | 53               | 21.1%   |
|            |           |                    | GG       | 877                | 95.1%   | 1023              | 95.3%   | 225               | 73.8%   | 195              | 77.7%   |
|            |           |                    | missing  | 0                  | 0.0%    | 1                 | 0.1%    | 0                 | 0.0%    | 0                | 0.0%    |
|            | rs3813867 | G/C                | CC       | 1                  | 0.1%    | 0                 | 0.0%    | 1                 | 0.3%    | 1                | 0.4%    |
|            |           |                    | CG       | 51                 | 5.5%    | 58                | 5.4%    | 30                | 9.8%    | 25               | 10.0%   |
|            |           |                    | GG       | 870                | 94.4%   | 1016              | 94.6%   | 273               | 89.5%   | 224              | 89.2%   |
|            |           |                    | missing  | 0                  | 0.0%    | 0                 | 0.0%    | 1                 | 0.3%    | 1                | 0.4%    |
|            | rs8192772 | T/C                | CC       | 6                  | 0.7%    | 7                 | 0.7%    | 3                 | 1.0%    | 2                | 0.8%    |
|            |           |                    | CT       | 127                | 13.8%   | 146               | 13.6%   | 64                | 21.0%   | 53               | 21.1%   |
|            |           |                    | TT       | 789                | 85.6%   | 921               | 85.8%   | 237               | 77.7%   | 196              | 78.1%   |
|            |           |                    | missing  | 0                  | 0.0%    | 0                 | 0.0%    | 1                 | 0.3%    | 0                | 0.0%    |
|            | rs915908  | G/A                | AA       | 21                 | 2.3%    | 27                | 2.5%    | 0                 | 0.0%    | 1                | 0.4%    |
|            |           |                    | AG       | 211                | 22.9%   | 266               | 24.8%   | 18                | 5.9%    | 22               | 8.8%    |
|            |           |                    | GG       | 690                | 74.8%   | 781               | 72.7%   | 287               | 94.1%   | 228              | 90.8%   |
|            |           |                    | missing  | 0                  | 0.0%    | 0                 | 0.0%    | 0                 | 0.0%    | 0                | 0.0%    |
| rs915909   | C/T       | TT                 | 0        | 0.0%               | 0       | 0.0%              | 5       | 1.6%              | 2       | 0.8%             |         |
|            |           | TC                 | 1        | 0.1%               | 4       | 0.4%              | 53      | 17.4%             | 40      | 15.9%            |         |
|            |           | CC                 | 921      | 99.9%              | 1070    | 99.6%             | 246     | 80.7%             | 204     | 81.3%            |         |
|            |           | missing            | 0        | 0.0%               | 0       | 0.0%              | 1       | 0.3%              | 5       | 2.0%             |         |
| rs7092584  | C/T       | TT                 | 11       | 1.2%               | 9       | 0.8%              | 4       | 1.3%              | 5       | 2.0%             |         |
|            |           | TC                 | 168      | 18.2%              | 197     | 18.3%             | 80      | 26.2%             | 58      | 23.1%            |         |
|            |           | CC                 | 743      | 80.6%              | 868     | 80.8%             | 219     | 71.8%             | 187     | 74.5%            |         |
|            |           | missing            | 0        | 0.0%               | 0       | 0.0%              | 2       | 0.7%              | 1       | 0.4%             |         |
| rs743535   | C/T       | TT                 | 11       | 1.2%               | 6       | 0.6%              | 7       | 2.3%              | 4       | 1.6%             |         |
|            |           | CT                 | 149      | 16.2%              | 176     | 16.4%             | 82      | 26.9%             | 57      | 22.7%            |         |
|            |           | CC                 | 757      | 82.1%              | 886     | 82.5%             | 212     | 69.5%             | 188     | 74.9%            |         |
|            |           | missing            | 5        | 0.5%               | 6       | 0.6%              | 4       | 1.3%              | 2       | 0.8%             |         |

**Table S1. Distribution of SNP genotypes in cases and controls, by race**

| Gene                                     | SNP                      | Major/minor allele | Genotype | European-Americans |         |                   |         | African-Americans |         |                  |         |
|------------------------------------------|--------------------------|--------------------|----------|--------------------|---------|-------------------|---------|-------------------|---------|------------------|---------|
|                                          |                          |                    |          | Cases (n=922)      |         | Controls (n=1074) |         | Cases (n=305)     |         | Controls (n=251) |         |
|                                          |                          |                    |          | n                  | (col %) | n                 | (col %) | n                 | (col %) | n                | (col %) |
|                                          | rs2249695<br>"tipsy" SNP | C/T                | TT       | 34                 | 3.7%    | 41                | 3.8%    | 28                | 9.2%    | 23               | 9.2%    |
|                                          |                          |                    | TC       | 292                | 31.7%   | 372               | 34.6%   | 124               | 40.7%   | 103              | 41.0%   |
|                                          |                          |                    | CC       | 595                | 64.5%   | 661               | 61.5%   | 153               | 50.2%   | 124              | 49.4%   |
|                                          |                          |                    | missing  | 1                  | 0.1%    | 0                 | 0.0%    | 0                 | 0.0%    | 1                | 0.4%    |
|                                          | rs28969387               | A/T                | TT       | 0                  | 0.0%    | 0                 | 0.0%    | 0                 | 0.0%    | 0                | 0.0%    |
|                                          |                          |                    | TA       | 2                  | 0.2%    | 0                 | 0.0%    | 23                | 7.5%    | 20               | 8.0%    |
|                                          |                          |                    | AA       | 920                | 99.8%   | 1074              | 100.0%  | 282               | 92.5%   | 231              | 92.0%   |
|                                          |                          |                    | missing  | 0                  | 0.0%    | 0                 | 0.0%    | 0                 | 0.0%    | 0                | 0.0%    |
|                                          | rs11101812               | T/C                | CC       | 0                  | 0.0%    | 0                 | 0.0%    | 2                 | 0.7%    | 1                | 0.4%    |
|                                          |                          |                    | CT       | 2                  | 0.2%    | 1                 | 0.1%    | 22                | 7.2%    | 18               | 7.2%    |
|                                          |                          |                    | TT       | 919                | 99.7%   | 1073              | 99.9%   | 279               | 91.5%   | 230              | 91.6%   |
|                                          |                          |                    | missing  | 1                  | 0.1%    | 0                 | 0.0%    | 2                 | 0.7%    | 2                | 0.8%    |
| <b>OXIDATIVE STRESS METABOLISM GENES</b> |                          |                    |          |                    |         |                   |         |                   |         |                  |         |
| <i>CAT</i>                               | rs1049982                | C/T                | TT       | 95                 | 10.3%   | 106               | 9.9%    | 92                | 30.2%   | 76               | 30.3%   |
|                                          |                          |                    | TC       | 396                | 43.0%   | 449               | 41.8%   | 147               | 48.2%   | 123              | 49.0%   |
|                                          |                          |                    | CC       | 429                | 46.5%   | 514               | 47.9%   | 65                | 21.3%   | 50               | 19.9%   |
|                                          |                          |                    | missing  | 2                  | 0.2%    | 5                 | 0.5%    | 1                 | 0.3%    | 2                | 0.8%    |
| <i>GPX1</i>                              | rs8179172                | T/A                | AA       | 0                  | 0.0%    | 0                 | 0.0%    | 0                 | 0.0%    | 1                | 0.4%    |
|                                          |                          |                    | AT       | 1                  | 0.1%    | 2                 | 0.2%    | 50                | 16.4%   | 48               | 19.1%   |
|                                          |                          |                    | TT       | 921                | 99.9%   | 1072              | 99.8%   | 255               | 83.6%   | 202              | 80.5%   |
|                                          |                          |                    | missing  | 0                  | 0.0%    | 0                 | 0.0%    | 0                 | 0.0%    | 0                | 0.0%    |
|                                          | rs1800668                | C/T                | TT       | 77                 | 8.4%    | 101               | 9.4%    | 15                | 4.9%    | 19               | 7.6%    |
|                                          |                          |                    | TC       | 381                | 41.3%   | 437               | 40.7%   | 115               | 37.7%   | 91               | 36.3%   |
|                                          |                          |                    | CC       | 464                | 50.3%   | 533               | 49.6%   | 174               | 57.0%   | 140              | 55.8%   |
|                                          |                          |                    | missing  | 0                  | 0.0%    | 3                 | 0.3%    | 1                 | 0.3%    | 1                | 0.4%    |
|                                          | rs3811699                | A/G                | GG       | 79                 | 8.6%    | 100               | 9.3%    | 23                | 7.5%    | 28               | 11.2%   |
|                                          |                          |                    | GA       | 379                | 41.1%   | 442               | 41.2%   | 133               | 43.6%   | 105              | 41.8%   |
|                                          |                          |                    | AA       | 464                | 50.3%   | 532               | 49.5%   | 149               | 48.9%   | 118              | 47.0%   |
|                                          |                          |                    | missing  | 0                  | 0.0%    | 0                 | 0.0%    | 0                 | 0.0%    | 0                | 0.0%    |
| rs3448                                   | C/T                      | TT                 | 84       | 9.1%               | 83      | 7.7%              | 29      | 9.5%              | 17      | 6.8%             |         |
|                                          |                          | TC                 | 350      | 38.0%              | 397     | 37.0%             | 115     | 37.7%             | 96      | 38.2%            |         |
|                                          |                          | CC                 | 488      | 52.9%              | 594     | 55.3%             | 161     | 52.8%             | 138     | 55.0%            |         |
|                                          |                          | missing            | 0        | 0.0%               | 0       | 0.0%              | 0       | 0.0%              | 0       | 0.0%             |         |
| <i>GPX2</i>                              | rs11623705               | G/T                | TT       | 13                 | 1.4%    | 15                | 1.4%    | 0                 | 0.0%    | 0                | 0.0%    |
|                                          |                          |                    | TG       | 199                | 21.6%   | 220               | 20.5%   | 15                | 4.9%    | 19               | 7.6%    |
|                                          |                          |                    | GG       | 710                | 77.0%   | 839               | 78.1%   | 290               | 95.1%   | 232              | 92.4%   |
|                                          |                          |                    | missing  | 0                  | 0.0%    | 0                 | 0.0%    | 0                 | 0.0%    | 0                | 0.0%    |
|                                          | rs2412065                | G/C                | CC       | 37                 | 4.0%    | 55                | 5.1%    | 48                | 15.7%   | 47               | 18.7%   |
|                                          |                          |                    | CG       | 290                | 31.5%   | 369               | 34.4%   | 154               | 50.5%   | 119              | 47.4%   |
|                                          |                          |                    | GG       | 595                | 64.5%   | 650               | 60.5%   | 103               | 33.8%   | 85               | 33.9%   |
|                                          |                          |                    | missing  | 0                  | 0.0%    | 0                 | 0.0%    | 0                 | 0.0%    | 0                | 0.0%    |
|                                          | rs2737844                | C/T                | TT       | 76                 | 8.2%    | 109               | 10.1%   | 209               | 68.5%   | 162              | 64.5%   |
|                                          |                          |                    | TC       | 361                | 39.2%   | 462               | 43.0%   | 82                | 26.9%   | 75               | 29.9%   |
|                                          |                          |                    | CC       | 481                | 52.2%   | 498               | 46.4%   | 13                | 4.3%    | 14               | 5.6%    |
|                                          |                          |                    | missing  | 4                  | 0.4%    | 5                 | 0.5%    | 1                 | 0.3%    | 0                | 0.0%    |
| <i>GPX4</i>                              | rs757229                 | G/C                | CC       | 192                | 20.8%   | 233               | 21.7%   | 104               | 34.1%   | 86               | 34.3%   |
|                                          |                          |                    | CG       | 484                | 52.5%   | 522               | 48.6%   | 145               | 47.5%   | 123              | 49.0%   |
|                                          |                          |                    | GG       | 246                | 26.7%   | 318               | 29.6%   | 55                | 18.0%   | 42               | 16.7%   |
|                                          |                          |                    | missing  | 0                  | 0.0%    | 1                 | 0.1%    | 1                 | 0.3%    | 0                | 0.0%    |
| <i>SOD1</i>                              | rs11910115               | A/C                | CC       | 0                  | 0.0%    | 0                 | 0.0%    | 2                 | 0.7%    | 5                | 2.0%    |
|                                          |                          |                    | CA       | 1                  | 0.1%    | 1                 | 0.1%    | 59                | 19.3%   | 59               | 23.5%   |
|                                          |                          |                    | AA       | 921                | 99.9%   | 1073              | 99.9%   | 244               | 80.0%   | 187              | 74.5%   |
|                                          |                          |                    | missing  | 0                  | 0.0%    | 0                 | 0.0%    | 0                 | 0.0%    | 0                | 0.0%    |
|                                          | rs4998557                | G/A                | AA       | 12                 | 1.3%    | 14                | 1.3%    | 41                | 13.4%   | 40               | 15.9%   |
|                                          |                          |                    | AG       | 205                | 22.2%   | 195               | 18.2%   | 137               | 44.9%   | 111              | 44.2%   |
|                                          |                          |                    | GG       | 704                | 76.4%   | 862               | 80.3%   | 127               | 41.6%   | 100              | 39.8%   |
|                                          |                          |                    | missing  | 1                  | 0.1%    | 3                 | 0.3%    | 0                 | 0.0%    | 0                | 0.0%    |

**Table S1. Distribution of SNP genotypes in cases and controls, by race**

| Gene      | SNP        | Major/minor<br>allele | Genotype | European-Americans |         |                   |         | African-Americans |         |                  |         |
|-----------|------------|-----------------------|----------|--------------------|---------|-------------------|---------|-------------------|---------|------------------|---------|
|           |            |                       |          | Cases (n=922)      |         | Controls (n=1074) |         | Cases (n=305)     |         | Controls (n=251) |         |
|           |            |                       |          | n                  | (col %) | n                 | (col %) | n                 | (col %) | n                | (col %) |
|           | rs10432782 | T/G                   | GG       | 12                 | 1.3%    | 14                | 1.3%    | 20                | 6.6%    | 20               | 8.0%    |
|           |            |                       | GT       | 205                | 22.2%   | 194               | 18.1%   | 113               | 37.0%   | 101              | 40.2%   |
|           |            |                       | TT       | 704                | 76.4%   | 865               | 80.5%   | 172               | 56.4%   | 130              | 51.8%   |
|           |            |                       | missing  | 1                  | 0.1%    | 1                 | 0.1%    | 0                 | 0.0%    | 0                | 0.0%    |
|           | rs2070424  | A/G                   | GG       | 6                  | 0.7%    | 5                 | 0.5%    | 6                 | 2.0%    | 7                | 2.8%    |
|           |            |                       | AG       | 127                | 13.8%   | 113               | 10.5%   | 83                | 27.2%   | 77               | 30.7%   |
|           |            |                       | AA       | 789                | 85.6%   | 956               | 89.0%   | 216               | 70.8%   | 167              | 66.5%   |
|           |            |                       | missing  | 0                  | 0.0%    | 0                 | 0.0%    | 0                 | 0.0%    | 0                | 0.0%    |
|           | rs1041740  | C/T                   | TT       | 88                 | 9.5%    | 101               | 9.4%    | 6                 | 2.0%    | 3                | 1.2%    |
|           |            |                       | TC       | 387                | 42.0%   | 473               | 44.0%   | 62                | 20.3%   | 43               | 17.1%   |
|           |            |                       | CC       | 447                | 48.5%   | 500               | 46.6%   | 237               | 77.7%   | 205              | 81.7%   |
|           |            |                       | missing  | 0                  | 0.0%    | 0                 | 0.0%    | 0                 | 0.0%    | 0                | 0.0%    |
| SOD2      | rs4342445  | G/A                   | AA       | 57                 | 6.2%    | 56                | 5.2%    | 5                 | 1.6%    | 4                | 1.6%    |
|           |            |                       | AG       | 340                | 36.9%   | 355               | 33.1%   | 71                | 23.3%   | 59               | 23.5%   |
|           |            |                       | GG       | 525                | 56.9%   | 663               | 61.7%   | 229               | 75.1%   | 188              | 74.9%   |
|           |            |                       | missing  | 0                  | 0.0%    | 0                 | 0.0%    | 0                 | 0.0%    | 0                | 0.0%    |
|           | rs2842980  | A/T                   | TT       | 42                 | 4.6%    | 61                | 5.7%    | 30                | 9.8%    | 24               | 9.6%    |
|           |            |                       | TA       | 299                | 32.4%   | 338               | 31.5%   | 139               | 45.6%   | 92               | 36.7%   |
|           |            |                       | AA       | 581                | 63.0%   | 675               | 62.8%   | 136               | 44.6%   | 135              | 53.8%   |
|           |            |                       | missing  | 0                  | 0.0%    | 0                 | 0.0%    | 0                 | 0.0%    | 0                | 0.0%    |
|           | rs8031     | T/A                   | AA       | 206                | 22.3%   | 267               | 24.9%   | 31                | 10.2%   | 35               | 13.9%   |
|           |            |                       | AT       | 467                | 50.7%   | 534               | 49.7%   | 134               | 43.9%   | 107              | 42.6%   |
|           |            |                       | TT       | 249                | 27.0%   | 273               | 25.4%   | 140               | 45.9%   | 109              | 43.4%   |
|           |            |                       | missing  | 0                  | 0.0%    | 0                 | 0.0%    | 0                 | 0.0%    | 0                | 0.0%    |
| rs5746134 | C/T        | TT                    | 0        | 0.0%               | 0       | 0.0%              | 7       | 2.3%              | 3       | 1.2%             |         |
|           |            | TC                    | 0        | 0.0%               | 4       | 0.4%              | 93      | 30.5%             | 58      | 23.1%            |         |
|           |            | CC                    | 922      | 100.0%             | 1070    | 99.6%             | 205     | 67.2%             | 190     | 75.7%            |         |
|           |            | missing               | 0        | 0.0%               | 0       | 0.0%              | 0       | 0.0%              | 0       | 0.0%             |         |
| rs2758331 | C/A        | AA                    | 204      | 22.1%              | 264     | 24.6%             | 18      | 5.9%              | 18      | 7.2%             |         |
|           |            | AC                    | 468      | 50.8%              | 537     | 50.0%             | 113     | 37.0%             | 87      | 34.7%            |         |
|           |            | CC                    | 250      | 27.1%              | 273     | 25.4%             | 174     | 57.0%             | 146     | 58.2%            |         |
|           |            | missing               | 0        | 0.0%               | 0       | 0.0%              | 0       | 0.0%              | 0       | 0.0%             |         |

**Table S2. SNP effects on odds of developing cancer (dominant genetic model)**

| Gene                            | SNP        | major/<br>minor<br>alleles | Oral cavity, oropharyngeal,<br>hypopharyngeal cancer NOS |                                         |                                      |                      | Oropharyngeal cancer              |                                         |                                      |                      |
|---------------------------------|------------|----------------------------|----------------------------------------------------------|-----------------------------------------|--------------------------------------|----------------------|-----------------------------------|-----------------------------------------|--------------------------------------|----------------------|
|                                 |            |                            | n cases/controls                                         |                                         | Adjusted OR <sup>b</sup><br>(95% CI) | p-value <sup>c</sup> | n cases/controls                  |                                         | Adjusted OR <sup>b</sup><br>(95% CI) | p-value <sup>c</sup> |
|                                 |            |                            | homozygous<br>for major<br>allele                        | one or two<br>copies of<br>minor allele |                                      |                      | homozygous<br>for major<br>allele | one or two<br>copies of<br>minor allele |                                      |                      |
| <b>ALCOHOL METABOLISM GENES</b> |            |                            |                                                          |                                         |                                      |                      |                                   |                                         |                                      |                      |
| <i>ADH1B</i>                    | rs12507573 | C/A                        | 71/386                                                   | 152/935                                 | 0.94 (0.80-1.11)                     | 1.00                 | 91/386                            | 241/935                                 | 1.02 (0.88-1.17)                     | 1.00                 |
|                                 | rs1042026  | A/G                        | 125/744                                                  | 98/578                                  | 1.04 (0.89-1.22)                     | 1.00                 | 193/744                           | 139/578                                 | 0.97 (0.84-1.11)                     | 1.00                 |
|                                 | rs7673353  | C/T                        | 204/1239                                                 | 19/83                                   | 1.09 (0.79-1.50)                     | 1.00                 | 309/1239                          | 23/83                                   | 0.97 (0.72-1.29)                     | 1.00                 |
|                                 | rs17028834 | T/C                        | 211/1265                                                 | 12/57                                   | 1.05 (0.72-1.53)                     | 1.00                 | 312/1265                          | 20/57                                   | 1.29 (0.94-1.77)                     | 1.00                 |
|                                 | rs1693457  | T/C                        | 136/860                                                  | 86/461                                  | 1.13 (0.97-1.32)                     | 1.00                 | 223/860                           | 109/461                                 | 1.02 (0.89-1.18)                     | 1.00                 |
|                                 | rs1229984  | G/A                        | 219/1243                                                 | 4/79                                    | 0.60 (0.36-1.01)                     | 1.00                 | 322/1243                          | 10/79                                   | 0.74 (0.52-1.06)                     | 1.00                 |
|                                 | rs1159918  | G/T                        | 65/468                                                   | 158/854                                 | 1.16 (0.98-1.37)                     | 1.00                 | 109/468                           | 223/854                                 | 1.12 (0.97-1.29)                     | 1.00                 |
|                                 | rs1229982  | G/T                        | 129/775                                                  | 94/547                                  | 0.99 (0.84-1.16)                     | 1.00                 | 197/775                           | 135/547                                 | 0.98 (0.85-1.12)                     | 1.00                 |
| <i>ADH1C</i>                    | rs2298753  | T/C                        | 180/1117                                                 | 43/205                                  | 1.18 (0.97-1.44)                     | 1.00                 | 270/1117                          | 62/205                                  | 1.19 (1.00-1.41)                     | 1.00                 |
|                                 | rs1614972  | C/T                        | 95/585                                                   | 128/737                                 | 1.02 (0.87-1.19)                     | 1.00                 | 141/585                           | 191/737                                 | 1.02 (0.89-1.16)                     | 1.00                 |
|                                 | rs1391088  | C/A                        | 192/1119                                                 | 31/203                                  | 0.98 (0.79-1.22)                     | 1.00                 | 280/1119                          | 52/203                                  | 1.03 (0.86-1.24)                     | 1.00                 |
|                                 | rs1693482  | C/T                        | 97/585                                                   | 125/735                                 | 1.03 (0.88-1.20)                     | 1.00                 | 145/585                           | 186/735                                 | 1.03 (0.90-1.18)                     | 1.00                 |
|                                 | rs1631460  | C/G                        | 93/574                                                   | 130/748                                 | 1.05 (0.90-1.23)                     | 1.00                 | 144/574                           | 188/748                                 | 1.02 (0.89-1.17)                     | 1.00                 |
|                                 | rs11936869 | C/G                        | 111/645                                                  | 112/676                                 | 0.96 (0.83-1.12)                     | 1.00                 | 161/645                           | 171/676                                 | 0.99 (0.87-1.13)                     | 1.00                 |
| <i>ADH4</i>                     | rs29001227 | A/T                        | 208/1253                                                 | 15/69                                   | 1.00 (0.70-1.42)                     | 1.00                 | 305/1253                          | 27/69                                   | 1.33 (0.99-1.79)                     | 1.00                 |
|                                 | rs1126672  | C/T                        | 131/758                                                  | 92/564                                  | 1.02 (0.87-1.19)                     | 1.00                 | 201/758                           | 131/564                                 | 0.96 (0.83-1.10)                     | 1.00                 |
|                                 | rs4699710  | T/C                        | 120/684                                                  | 103/638                                 | 0.98 (0.84-1.13)                     | 1.00                 | 179/684                           | 153/638                                 | 0.96 (0.84-1.10)                     | 1.00                 |
|                                 | rs10017466 | T/C                        | 106/632                                                  | 117/690                                 | 1.00 (0.87-1.16)                     | 1.00                 | 157/632                           | 174/690                                 | 1.02 (0.89-1.16)                     | 1.00                 |
|                                 | rs1800759  | C/A                        | 75/412                                                   | 148/910                                 | 0.93 (0.79-1.10)                     | 1.00                 | 101/412                           | 231/910                                 | 1.00 (0.87-1.16)                     | 1.00                 |
|                                 | rs1800761  | G/A                        | 134/830                                                  | 89/492                                  | 1.01 (0.87-1.18)                     | 1.00                 | 193/830                           | 139/492                                 | 1.07 (0.94-1.22)                     | 1.00                 |
|                                 | rs3762894  | T/C                        | 150/906                                                  | 73/416                                  | 1.00 (0.86-1.18)                     | 1.00                 | 218/906                           | 114/416                                 | 1.04 (0.91-1.20)                     | 1.00                 |
| <i>ADH7</i>                     | rs284787   | C/T                        | 126/817                                                  | 97/505                                  | 1.14 (0.98-1.33)                     | 1.00                 | 208/817                           | 124/505                                 | 1.01 (0.88-1.16)                     | 1.00                 |
|                                 | rs894369   | C/G                        | 153/849                                                  | 70/472                                  | 0.93 (0.80-1.09)                     | 1.00                 | 217/849                           | 115/472                                 | 0.96 (0.84-1.10)                     | 1.00                 |
|                                 | rs17588403 | T/A                        | 157/887                                                  | 66/435                                  | 0.92 (0.78-1.08)                     | 1.00                 | 230/887                           | 102/435                                 | 0.94 (0.81-1.08)                     | 1.00                 |
|                                 | rs1154454  | T/C                        | 134/808                                                  | 89/514                                  | 0.95 (0.81-1.11)                     | 1.00                 | 208/808                           | 124/514                                 | 0.94 (0.82-1.09)                     | 1.00                 |
|                                 | rs1154456  | T/C                        | 108/629                                                  | 115/693                                 | 0.98 (0.84-1.14)                     | 1.00                 | 150/629                           | 182/693                                 | 1.08 (0.94-1.24)                     | 1.00                 |
|                                 | rs1154460  | G/A                        | 61/377                                                   | 161/944                                 | 1.01 (0.86-1.20)                     | 1.00                 | 88/377                            | 244/944                                 | 1.06 (0.91-1.23)                     | 1.00                 |
|                                 | rs971074   | G/A                        | 168/1027                                                 | 55/295                                  | 1.07 (0.90-1.27)                     | 1.00                 | 257/1027                          | 75/295                                  | 0.95 (0.81-1.12)                     | 1.00                 |
|                                 | rs1573496  | C/G                        | 186/1117                                                 | 36/205                                  | 1.08 (0.88-1.33)                     | 1.00                 | 292/1117                          | 40/205                                  | 0.84 (0.69-1.02)                     | 1.00                 |
| <i>ALDH2</i>                    | rs4767939  | A/G                        | 135/806                                                  | 88/516                                  | 0.99 (0.85-1.16)                     | 1.00                 | 191/806                           | 140/516                                 | 1.08 (0.94-1.23)                     | 1.00                 |
|                                 | rs2238151  | T/C                        | 66/482                                                   | 156/837                                 | 1.13 (0.95-1.34)                     | 1.00                 | 114/482                           | 217/837                                 | 1.02 (0.88-1.18)                     | 1.00                 |
|                                 | rs7312055  | G/A                        | 196/1201                                                 | 27/121                                  | 0.88 (0.65-1.20)                     | 1.00                 | 301/1201                          | 31/121                                  | 0.83 (0.64-1.09)                     | 1.00                 |
|                                 | rs2158029  | G/A                        | 216/1269                                                 | 7/53                                    | 0.74 (0.47-1.14)                     | 1.00                 | 316/1269                          | 16/53                                   | 1.06 (0.76-1.47)                     | 1.00                 |
|                                 | rs16941667 | C/T                        | 189/1097                                                 | 34/224                                  | 0.96 (0.78-1.18)                     | 1.00                 | 266/1097                          | 66/224                                  | 1.11 (0.94-1.31)                     | 1.00                 |
|                                 | rs16941669 | T/G                        | 175/1084                                                 | 48/236                                  | 1.14 (0.95-1.37)                     | 1.00                 | 272/1084                          | 60/236                                  | 0.98 (0.83-1.16)                     | 1.00                 |
| <i>CYP2E1</i>                   | rs3813865  | G/C                        | 204/1215                                                 | 19/106                                  | 1.02 (0.77-1.36)                     | 1.00                 | 298/1215                          | 34/106                                  | 1.11 (0.88-1.40)                     | 1.00                 |
|                                 | rs3813867  | G/C                        | 207/1237                                                 | 16/84                                   | 1.02 (0.76-1.37)                     | 1.00                 | 316/1237                          | 16/84                                   | 0.81 (0.60-1.09)                     | 1.00                 |
|                                 | rs8192772  | T/C                        | 195/1114                                                 | 28/208                                  | 0.92 (0.73-1.15)                     | 1.00                 | 279/1114                          | 53/208                                  | 1.07 (0.90-1.28)                     | 1.00                 |
|                                 | rs915908   | G/A                        | 164/1006                                                 | 59/316                                  | 1.11 (0.93-1.32)                     | 1.00                 | 263/1006                          | 69/316                                  | 0.89 (0.75-1.04)                     | 1.00                 |
|                                 | rs915909   | C/T                        | 212/1271                                                 | 11/46                                   | 1.11 (0.75-1.62)                     | 1.00                 | 317/1271                          | 15/46                                   | 1.02 (0.72-1.45)                     | 1.00                 |
|                                 | rs7092584  | C/T                        | 181/1052                                                 | 42/269                                  | 0.98 (0.81-1.19)                     | 1.00                 | 262/1052                          | 70/269                                  | 1.05 (0.89-1.23)                     | 1.00                 |
|                                 | rs743535   | C/T                        | 182/1071                                                 | 41/243                                  | 0.99 (0.82-1.20)                     | 1.00                 | 268/1071                          | 60/243                                  | 1.00 (0.85-1.19)                     | 1.00                 |
|                                 | rs2249695  | C/T                        | 108/682                                                  | 115/639                                 | 1.01 (0.86-1.19)                     | 1.00                 | 180/682                           | 152/639                                 | 0.90 (0.78-1.04)                     | 1.00                 |
|                                 | rs28969387 | A/T                        | 219/1302                                                 | 4/20                                    | 1.06 (0.59-1.90)                     | 1.00                 | 326/1302                          | 6/20                                    | 0.93 (0.56-1.53)                     | 1.00                 |
|                                 | rs11101812 | T/C                        | 219/1300                                                 | 3/20                                    | 0.98 (0.52-1.85)                     | 1.00                 | 327/1300                          | 4/20                                    | 0.92 (0.52-1.63)                     | 1.00                 |

Table S2, p. 2 of 2

|                                          |            | Oral cavity, oropharyngeal,<br>hypopharyngeal cancer NOS |                                   |                                         |                                      |                      | Oropharyngeal cancer              |                                         |                                      |                      |
|------------------------------------------|------------|----------------------------------------------------------|-----------------------------------|-----------------------------------------|--------------------------------------|----------------------|-----------------------------------|-----------------------------------------|--------------------------------------|----------------------|
| Gene                                     | SNP        | major/<br>minor<br>alleles                               | n cases/controls                  |                                         | Adjusted OR <sup>b</sup><br>(95% CI) | p-value <sup>c</sup> | n cases/controls                  |                                         | Adjusted OR <sup>b</sup><br>(95% CI) | p-value <sup>c</sup> |
|                                          |            |                                                          | homozygous<br>for major<br>allele | one or two<br>copies of<br>minor allele |                                      |                      | homozygous<br>for major<br>allele | one or two<br>copies of<br>minor allele |                                      |                      |
| <b>OXIDATIVE STRESS METABOLISM GENES</b> |            |                                                          |                                   |                                         |                                      |                      |                                   |                                         |                                      |                      |
| <i>CAT</i>                               | rs1049982  | C/T                                                      | 100/589                           | 123/726                                 | 0.97 (0.831.13)                      | 1.00                 | 134/589                           | 197/726                                 | 1.07 (0.94-1.22)                     | 1.00                 |
| <i>GPX1</i>                              | rs8179172  | T/A                                                      | 212/1271                          | 11/51                                   | 0.97 (0.661.44)                      | 1.00                 | 320/1271                          | 12/51                                   | 0.90 (0.62-1.29)                     | 1.00                 |
|                                          | rs1800668  | C/T                                                      | 113/672                           | 110/646                                 | 1.06 (0.911.23)                      | 1.00                 | 172/672                           | 160/646                                 | 1.02 (0.89-1.16)                     | 1.00                 |
|                                          | rs3811699  | A/G                                                      | 109/649                           | 114/673                                 | 1.06 (0.911.23)                      | 1.00                 | 167/649                           | 165/673                                 | 1.01 (0.89-1.15)                     | 1.00                 |
|                                          | rs3448     | C/T                                                      | 113/729                           | 110/593                                 | 1.12 (0.971.31)                      | 1.00                 | 190/729                           | 142/593                                 | 0.98 (0.86-1.12)                     | 1.00                 |
| <i>GPX2</i>                              | rs11623705 | G/T                                                      | 185/1069                          | 38/253                                  | 0.94 (0.771.14)                      | 1.00                 | 268/1069                          | 64/253                                  | 1.02 (0.86-1.21)                     | 1.00                 |
|                                          | rs2412065  | G/C                                                      | 122/733                           | 101/589                                 | 0.98 (0.841.15)                      | 1.00                 | 193/733                           | 139/589                                 | 0.94 (0.82-1.08)                     | 1.00                 |
|                                          | rs2737844  | C/T                                                      | 88/511                            | 134/806                                 | 0.95 (0.811.12)                      | 1.00                 | 136/511                           | 194/806                                 | 0.93 (0.81-1.08)                     | 1.00                 |
| <i>GPX4</i>                              | rs757229   | G/C                                                      | 60/358                            | 162/963                                 | 0.98 (0.831.16)                      | 1.00                 | 85/358                            | 247/963                                 | 1.02 (0.88-1.18)                     | 1.00                 |
| <i>SOD1</i>                              | rs11910115 | A/C                                                      | 208/1257                          | 15/65                                   | 1.01 (0.701.45)                      | 1.00                 | 319/1257                          | 13/65                                   | 0.86 (0.60-1.22)                     | 1.00                 |
|                                          | rs4998557  | G/A                                                      | 155/959                           | 68/360                                  | 1.00 (0.841.20)                      | 1.00                 | 232/959                           | 99/360                                  | 1.07 (0.92-1.25)                     | 1.00                 |
|                                          | rs10432782 | T/G                                                      | 163/992                           | 60/329                                  | 0.98 (0.821.17)                      | 1.00                 | 240/992                           | 91/329                                  | 1.07 (0.92-1.25)                     | 1.00                 |
|                                          | rs2070424  | A/G                                                      | 187/1120                          | 36/202                                  | 0.95 (0.761.17)                      | 1.00                 | 274/1120                          | 58/202                                  | 1.05 (0.88-1.26)                     | 1.00                 |
|                                          | rs1041740  | C/T                                                      | 127/705                           | 96/617                                  | 0.94 (0.801.10)                      | 1.00                 | 174/705                           | 158/617                                 | 0.99 (0.87-1.14)                     | 1.00                 |
| <i>SOD2</i>                              | rs4342445  | G/A                                                      | 145/850                           | 78/472                                  | 1.01 (0.861.18)                      | 1.00                 | 202/850                           | 130/472                                 | 1.08 (0.95-1.24)                     | 1.00                 |
|                                          | rs2842980  | A/T                                                      | 129/807                           | 94/515                                  | 1.06 (0.911.23)                      | 1.00                 | 189/807                           | 143/515                                 | 1.09 (0.96-1.25)                     | 1.00                 |
|                                          | rs8031     | T/A                                                      | 77/382                            | 146/940                                 | 0.91 (0.771.07)                      | 1.00                 | 102/382                           | 230/940                                 | 0.99 (0.86-1.14)                     | 1.00                 |
|                                          | rs5746134  | C/T                                                      | 207/1257                          | 16/65                                   | 1.20 (0.851.68)                      | 1.00                 | 304/1257                          | 28/65                                   | 1.41 (1.05-1.89)                     | 1.00                 |
|                                          | rs2758331  | C/A                                                      | 86/419                            | 137/903                                 | 0.90 (0.771.06)                      | 1.00                 | 108/419                           | 224/903                                 | 1.02 (0.88-1.17)                     | 1.00                 |

<sup>a</sup> Cases and controls do not sum to 1227 and 1325, respectively, because 4 cases and 3 controls are missing information on duration of cigarette smoking, and because a few subjects lack genotype information for some SNPs

<sup>b</sup> Conditional logistic regression models for estimating main effect of each SNP were conditioned on sex, race, and age category, and adjusted for continuous duration of smoking in years (rounded to whole years). Odds ratios are for those with one or more copies of the minor allele versus the referent group of those homozygous for the major allele (dominant genetic model).

<sup>c</sup> Bonferroni-corrected for 64 statistical tests

**Table S3. Haplotype effects on risk of developing SCCHN (additive genetic model)**

| European-Americans |                                   |            |            |                     | African-Americans        |                                        |           |                                   |            |            |                      |                          |                                        |                      |                      |                      |      |
|--------------------|-----------------------------------|------------|------------|---------------------|--------------------------|----------------------------------------|-----------|-----------------------------------|------------|------------|----------------------|--------------------------|----------------------------------------|----------------------|----------------------|----------------------|------|
| Gene               | Haplotype definition <sup>a</sup> |            |            | Haplotype frequency | OR (95% CI) <sup>b</sup> | Bonferroni-adjusted p-value (13 tests) | Gene      | Haplotype definition <sup>a</sup> |            |            | Haplotype frequency  | OR (95% CI) <sup>b</sup> | Bonferroni-adjusted p-value (12 tests) |                      |                      |                      |      |
| ADH1B              | rs12507573                        | rs1042026  | rs1693457  |                     |                          |                                        | ADH1B     | Haplotype 1:                      |            |            |                      |                          |                                        |                      |                      |                      |      |
|                    | A                                 | A          | T          | 0.459               | 1.00 (ref)               |                                        |           | rs12507573                        | rs1042026  |            | 0.483                | 1.00 (ref)               |                                        |                      |                      |                      |      |
|                    | C                                 | A          | C          | 0.183               | 1.17 ( 0.96 - 1.42 )     | 1.00                                   |           | C                                 | A          |            | 0.422                | 1.02 ( 0.75 - 1.39 )     | 1.00                                   |                      |                      |                      |      |
|                    | C                                 | A          | T          | 0.069               | 1.09 ( 0.83 - 1.44 )     | 1.00                                   |           | A                                 | A          |            | 0.096                | 0.80 ( 0.49 - 1.32 )     | 1.00                                   |                      |                      |                      |      |
|                    | C                                 | G          | T          | 0.287               | 1.05 ( 0.89 - 1.23 )     | 1.00                                   |           | C                                 | G          |            |                      |                          |                                        |                      |                      |                      |      |
|                    | *                                 | *          | *          | 0.002               | 0.30 ( 0.06 - 1.55 )     | 1.00                                   |           |                                   |            |            |                      |                          |                                        |                      |                      |                      |      |
|                    | Haplotype 2:                      |            |            |                     |                          |                                        |           |                                   |            |            |                      |                          |                                        |                      |                      |                      |      |
|                    | rs7673353                         | rs17028834 | rs1693457  | rs1159918           |                          |                                        |           | C                                 | T          | T          | G                    | 0.271                    | 1.00 (ref)                             |                      |                      |                      |      |
|                    | C                                 | C          | T          | T                   |                          |                                        |           | C                                 | C          | T          | T                    | 0.130                    | 1.84 ( 1.09 - 3.11 )                   | 0.28                 |                      |                      |      |
|                    | C                                 | T          | C          | T                   |                          |                                        |           | C                                 | T          | C          | T                    | 0.202                    | 0.79 ( 0.52 - 1.22 )                   | 1.00                 |                      |                      |      |
|                    | C                                 | T          | T          | T                   |                          |                                        |           | C                                 | T          | T          | T                    | 0.224                    | 1.21 ( 0.80 - 1.83 )                   | 1.00                 |                      |                      |      |
|                    | T                                 | T          | T          | T                   |                          |                                        |           | T                                 | T          | T          | T                    | 0.173                    | 1.06 ( 0.67 - 1.66 )                   | 1.00                 |                      |                      |      |
| ADH1C              | Haplotype 1:                      |            |            |                     |                          |                                        | ADH1C     | rs1614972                         | rs1391088  | rs1693482  | rs1631460            | rs11936869               |                                        |                      |                      |                      |      |
|                    | rs2298753                         | rs1614972  |            | 0.597               | 1.00 (ref)               |                                        |           | T                                 | C          | C          | C                    | G                        | 0.427                                  | 1.00 (ref)           |                      |                      |      |
|                    | T                                 | C          |            | 0.106               | 1.24 ( 0.99 - 1.55 )     | 0.76                                   |           | C                                 | A          | C          | C                    | C                        | 0.080                                  | 1.45 ( 0.80 - 2.62 ) | 1.00                 |                      |      |
|                    | C                                 | C          |            | 0.297               | 1.06 ( 0.91 - 1.23 )     | 1.00                                   |           | C                                 | C          | C          | C                    | C                        | 0.264                                  | 1.05 ( 0.74 - 1.51 ) | 1.00                 |                      |      |
|                    | T                                 | T          |            |                     |                          |                                        |           | C                                 | C          | T          | G                    | C                        | 0.160                                  | 1.40 ( 0.88 - 2.21 ) | 1.00                 |                      |      |
|                    | Haplotype 2:                      |            |            |                     |                          |                                        | T         | C                                 | C          | C          | C                    | 0.059                    | 1.29 ( 0.65 - 2.56 )                   | 1.00                 |                      |                      |      |
|                    | rs1693482                         | rs1631460  | rs11936869 |                     |                          |                                        | *         | *                                 | *          | *          | *                    | 0.010                    | 7.60 ( 0.99 - 58.20 )                  | 0.62                 |                      |                      |      |
|                    | T                                 | G          | C          | 0.400               | 1.00 (ref)               |                                        |           |                                   |            |            |                      |                          |                                        |                      |                      |                      |      |
|                    | C                                 | C          | C          | 0.333               | 0.94 ( 0.80 - 1.10 )     | 1.00                                   |           |                                   |            |            |                      |                          |                                        |                      |                      |                      |      |
|                    | C                                 | C          | G          | 0.263               | 1.00 ( 0.84 - 1.19 )     | 1.00                                   |           |                                   |            |            |                      |                          |                                        |                      |                      |                      |      |
|                    | C                                 | G          | C          | 0.004               | 0.99 ( 0.33 - 2.94 )     | 1.00                                   |           |                                   |            |            |                      |                          |                                        |                      |                      |                      |      |
| ADH4               | Haplotype 1:                      |            |            |                     |                          |                                        | ADH4      | Haplotype 1:                      |            |            |                      |                          |                                        |                      |                      |                      |      |
|                    | rs1126672                         | rs4699710  | rs10017466 | rs1800759           | 0.617                    | 1.00 (ref)                             |           | rs29001227                        | rs1126672  | rs4699710  | rs10017466           | rs1800759                | 0.408                                  | 1.00 (ref)           |                      |                      |      |
|                    | C                                 | T          | T          | C                   | 0.029                    | 1.32 ( 0.88 - 1.99 )                   |           | 1.00                              | A          | C          | T                    | T                        | A                                      | 0.074                | 0.94 ( 0.51 - 1.72 ) | 1.00                 |      |
|                    | C                                 | C          | C          | A                   | 0.078                    | 0.93 ( 0.72 - 1.22 )                   |           | 1.00                              | A          | C          | C                    | C                        | A                                      | 0.242                | 1.03 ( 0.70 - 1.50 ) | 1.00                 |      |
|                    | C                                 | T          | T          | A                   | 0.273                    | 0.96 ( 0.81 - 1.12 )                   |           | 1.00                              | A          | C          | T                    | T                        | C                                      | 0.110                | 1.50 ( 0.89 - 2.51 ) | 1.00                 |      |
|                    | *                                 | *          | *          | *                   | 0.002                    | 2.21 ( 0.61 - 7.97 )                   | 1.00      | A                                 | T          | C          | C                    | A                        | 0.164                                  | 1.61 ( 1.04 - 2.49 ) | 0.42                 |                      |      |
|                    | Haplotype 2:                      |            |            |                     |                          |                                        |           | Haplotype 2:                      |            |            |                      |                          |                                        |                      |                      |                      |      |
|                    | rs1800761                         | rs3762894  |            | 0.810               | 1.00 (ref)               |                                        | rs1800761 | rs3762894                         |            | 0.711      | 1.00 (ref)           |                          |                                        |                      |                      |                      |      |
|                    | G                                 | T          |            | 0.160               | 1.02 ( 0.84 - 1.23 )     | 1.00                                   | G         | T                                 |            | 0.210      | 0.92 ( 0.65 - 1.31 ) | 1.00                     |                                        |                      |                      |                      |      |
|                    | A                                 | C          |            | 0.029               | 1.38 ( 0.91 - 2.07 )     | 1.00                                   | A         | C                                 |            | 0.078      | 0.97 ( 0.55 - 1.70 ) | 1.00                     |                                        |                      |                      |                      |      |
|                    | A                                 | T          |            |                     |                          |                                        | A         | T                                 |            |            |                      |                          |                                        |                      |                      |                      |      |
| ADH7               | Haplotype 1:                      |            |            |                     |                          |                                        | ADH7      | Haplotype 1:                      |            |            |                      |                          |                                        |                      |                      |                      |      |
|                    | rs284787                          | rs894369   | rs17588403 | 0.371               | 1.00 (ref)               |                                        |           | rs284787                          | rs894369   | rs17588403 | 0.578                | 1.00 (ref)               |                                        |                      |                      |                      |      |
|                    | C                                 | C          | T          | 0.192               | 1.03 ( 0.85 - 1.25 )     | 1.00                                   |           | C                                 | C          | T          | 0.124                | 0.73 ( 0.46 - 1.18 )     | 1.00                                   |                      |                      |                      |      |
|                    | C                                 | C          | A          | 0.196               | 0.88 ( 0.73 - 1.06 )     | 1.00                                   |           | C                                 | C          | A          | 0.154                | 0.90 ( 0.59 - 1.38 )     | 1.00                                   |                      |                      |                      |      |
|                    | C                                 | G          | T          | 0.241               | 1.13 ( 0.95 - 1.35 )     | 1.00                                   |           | C                                 | G          | T          | 0.143                | 0.85 ( 0.55 - 1.32 )     | 1.00                                   |                      |                      |                      |      |
|                    | T                                 | C          | T          |                     |                          |                                        | T         | C                                 | T          |            |                      |                          |                                        |                      |                      |                      |      |
|                    | Haplotype 2:                      |            |            |                     |                          |                                        |           | Haplotype 2:                      |            |            |                      |                          |                                        |                      |                      |                      |      |
|                    | rs1154456                         | rs1154460  | rs971074   | rs1573496           | 0.539                    | 1.00 (ref)                             | rs1154456 | rs1154460                         | rs971074   | 0.508      | 1.00 (ref)           |                          |                                        |                      |                      |                      |      |
|                    | T                                 | G          | G          | C                   | 0.353                    | 1.08 ( 0.93 - 1.25 )                   | 1.00      | T                                 | G          | G          | 0.163                | 0.96 ( 0.63 - 1.48 )     | 1.00                                   |                      |                      |                      |      |
|                    | C                                 | A          | G          | C                   | 0.010                    | 0.93 ( 0.47 - 1.84 )                   | 1.00      | C                                 | A          | G          | 0.177                | 1.18 ( 0.77 - 1.81 )     | 1.00                                   |                      |                      |                      |      |
|                    | T                                 | A          | A          | C                   | 0.092                    | 0.98 ( 0.76 - 1.25 )                   | 1.00      | T                                 | A          | A          | 0.150                | 0.97 ( 0.63 - 1.48 )     | 1.00                                   |                      |                      |                      |      |
|                    | T                                 | A          | G          | C                   | 0.003                    | 2.78 ( 0.90 - 8.63 )                   | 1.00      | T                                 | A          | G          |                      |                          |                                        |                      |                      |                      |      |
|                    | *                                 | *          | *          | *                   | 0.002                    | 0.97 ( 0.12 - 8.06 )                   | 1.00      |                                   |            |            |                      |                          |                                        |                      |                      |                      |      |
| ALDH2              | rs4767939                         | rs2238151  | rs16941667 | rs16941669          | 0.650                    | 1.00 (ref)                             | ALDH2     | rs4767939                         | rs2238151  | rs7312055  | rs2158029            | rs16941667               | rs16941669                             | 0.263                | 1.00 (ref)           |                      |      |
|                    | A                                 | T          | C          | T                   | 0.102                    | 1.12 ( 0.89 - 1.41 )                   |           | 1.00                              | A          | C          | A                    | G                        | C                                      | T                    | 0.081                | 1.50 ( 0.79 - 2.83 ) | 1.00 |
|                    | A                                 | C          | C          | G                   | 0.057                    | 1.18 ( 0.88 - 1.60 )                   |           | 1.00                              | A          | C          | G                    | G                        | C                                      | G                    | 0.141                | 1.06 ( 0.65 - 1.73 ) | 1.00 |
|                    | A                                 | C          | C          | T                   | 0.106                    | 1.13 ( 0.90 - 1.42 )                   |           | 1.00                              | A          | C          | G                    | G                        | C                                      | T                    | 0.111                | 0.48 ( 0.28 - 0.83 ) | 0.11 |
|                    | G                                 | C          | C          | T                   | 0.083                    | 1.22 ( 0.95 - 1.58 )                   |           | 1.00                              | G          | T          | G                    | G                        | C                                      | T                    | 0.090                | 1.02 ( 0.57 - 1.85 ) | 1.00 |
|                    | G                                 | C          | T          |                     |                          |                                        | G         | C                                 | G          | A          | C                    | T                        | 0.177                                  | 1.05 ( 0.67 - 1.67 ) | 1.00                 |                      |      |
|                    | G                                 | C          | T          |                     |                          |                                        | G         | C                                 | G          | G          | C                    | T                        | 0.137                                  | 1.23 ( 0.75 - 2.02 ) | 1.00                 |                      |      |
| CYP2E1             | rs915908                          | rs7092584  | rs743535   | rs2249695           | 0.653                    | 1.00 (ref)                             | CYP2E1    | rs915908                          | rs7092584  | rs743535   | rs2249695            | 0.144                    | 0.88 ( 0.72 - 1.07 )                   | 1.00                 |                      |                      |      |
|                    | G                                 | C          | C          | C                   | 0.102                    | 0.73 ( 0.58 - 0.92 )                   |           | 0.11                              | G          | C          | C                    | T                        | 0.010                                  | 0.80 ( 0.40 - 1.61 ) | 1.00                 |                      |      |
|                    | A                                 | C          | C          | C                   | 0.010                    | 0.80 ( 0.40 - 1.61 )                   |           | 1.00                              | G          | T          | C                    | T                        | 0.089                                  | 1.03 ( 0.81 - 1.32 ) | 1.00                 |                      |      |
|                    | G                                 | C          | C          | T                   |                          |                                        |           |                                   | G          | T          | C                    | T                        |                                        |                      |                      |                      |      |
|                    | G                                 | T          | C          | T                   |                          |                                        |           |                                   | G          | T          | C                    | T                        |                                        |                      |                      |                      |      |
|                    | G                                 | T          | T          |                     |                          |                                        |           | G                                 | T          | T          |                      |                          |                                        |                      |                      |                      |      |
| GPX1               | rs1800668                         | rs3811699  | rs3448     |                     | 0.434                    | 1.00 (ref)                             | GPX1      | rs1800668                         | rs3811699  | rs3448     |                      | 0.422                    | 1.00 (ref)                             |                      |                      |                      |      |
|                    | C                                 | A          | C          | 0.271               | 1.05 ( 0.90 - 1.24 )     | 1.00                                   |           | C                                 | A          | C          | 0.271                | 1.14 ( 0.79 - 1.65 )     | 1.00                                   |                      |                      |                      |      |
|                    | C                                 | A          | T          | 0.294               | 1.02 ( 0.87 - 1.20 )     | 1.00                                   |           | C                                 | A          | T          | 0.060                | 0.87 ( 0.46 - 1.67 )     | 1.00                                   |                      |                      |                      |      |
|                    | T                                 | G          | C          |                     |                          |                                        |           | C                                 | G          | C          | 0.247                | 1.04 ( 0.72 - 1.52 )     | 1.00                                   |                      |                      |                      |      |
|                    | T                                 | G          | C          |                     |                          |                                        | T         | G                                 | C          |            |                      |                          |                                        |                      |                      |                      |      |
| GPX2               | rs11623705                        | rs2412065  | rs2737844  |                     | 0.700                    | 1.00 (ref)                             | GPX2      | rs2412065                         | rs2737844  |            | 0.417                | 1.00 (ref)               |                                        |                      |                      |                      |      |
|                    | G                                 | G          | C          | 0.092               | 0.69 ( 0.54 - 0.88 )     | 0.04                                   |           | C                                 | T          |            | 0.190                | 0.84 ( 0.56 - 1.25 )     | 1.00                                   |                      |                      |                      |      |
|                    | G                                 | C          | T          | 0.090               | 0.81 ( 0.63 - 1.03 )     | 1.00                                   |           | G                                 | C          |            | 0.393                | 1.07 ( 0.77 - 1.49 )     | 1.00                                   |                      |                      |                      |      |
|                    | G                                 | G          | T          | 0.119               | 0.98 ( 0.79 - 1.21 )     | 1.00                                   |           | G                                 | T          |            |                      |                          |                                        |                      |                      |                      |      |
|                    | T                                 | C          | T          |                     |                          |                                        |           |                                   |            |            |                      |                          |                                        |                      |                      |                      |      |
| SOD1               | rs4998557                         | rs10432782 | rs2070424  | rs1041740           | 0.576                    | 1.00 (ref)                             | SOD1      | rs4998557                         | rs10432782 | rs2070424  | rs1041740            | 0.097                    | 1.00 ( 0.59 - 1.71 )                   | 1.00                 |                      |                      |      |
|                    | G                                 | T          | A          | C                   | 0.048                    | 1.10 ( 0.79 - 1.52 )                   |           | 1.00                              | G          | T          | A                    | C                        | 0.167                                  | 0.56 ( 0.37 - 0.86 ) | 0.09                 |                      |      |
|                    | A                                 | G          | A          | C                   | 0.065                    | 1.42 ( 1.07 - 1.88 )                   |           | 0.18                              | A          | G          | A                    | C                        | 0.104                                  | 1.13 ( 0.68 - 1.90 ) | 1.00                 |                      |      |
|                    | A                                 | G          | G          | C                   | 0.311                    | 0.98 ( 0.84 - 1.14 )                   |           | 1.00                              | A          | G          | G                    | C                        | 0.111                                  | 1.15 ( 0.69 - 1.90 ) | 1.00                 |                      |      |
|                    | G                                 | T          | A          | T                   |                          |                                        |           | A                                 | T          | A          | C                    |                          |                                        |                      |                      |                      |      |
|                    | G                                 | T          | A          | T                   |                          |                                        |           | G                                 | T          | A          | T                    |                          |                                        |                      |                      |                      |      |

**Table S3. Haplotype effects on risk of developing SCCHN (additive genetic model)**

| European-Americans |                                   |           |        |           | African-Americans   |                          |                                        |      |                                   |           |        |           |                     |                          |                                        |      |
|--------------------|-----------------------------------|-----------|--------|-----------|---------------------|--------------------------|----------------------------------------|------|-----------------------------------|-----------|--------|-----------|---------------------|--------------------------|----------------------------------------|------|
| Gene               | Haplotype definition <sup>a</sup> |           |        |           | Haplotype frequency | OR (95% CI) <sup>b</sup> | Bonferroni-adjusted p-value (13 tests) | Gene | Haplotype definition <sup>a</sup> |           |        |           | Haplotype frequency | OR (95% CI) <sup>b</sup> | Bonferroni-adjusted p-value (12 tests) |      |
| SOD2               | rs4342445                         | rs2842980 | rs8031 | rs2758331 |                     |                          |                                        | SOD2 | rs4342445                         | rs2842980 | rs8031 | rs5746134 | rs2758331           |                          |                                        |      |
|                    | G                                 | A         | A      | A         | 0.486               | 1.00 (ref)               |                                        |      | G                                 | A         | A      | C         | A                   | 0.245                    | 1.00 (ref)                             |      |
|                    | A                                 | A         | T      | C         | 0.230               | 1.18 ( 1.00 - 1.40 )     | 0.71                                   |      | A                                 | A         | T      | C         | C                   | 0.133                    | 1.00 ( 0.59 - 1.68 )                   | 1.00 |
|                    | G                                 | A         | T      | C         | 0.071               | 0.96 ( 0.73 - 1.27 )     | 1.00                                   |      | G                                 | A         | A      | C         | C                   | 0.091                    | 0.68 ( 0.39 - 1.20 )                   | 1.00 |
|                    | G                                 | T         | T      | C         | 0.211               | 1.00 ( 0.84 - 1.20 )     | 1.00                                   |      | G                                 | A         | T      | C         | C                   | 0.227                    | 0.65 ( 0.41 - 1.02 )                   | 0.74 |
|                    | *                                 | *         | *      | *         | 0.002               | 3.01 ( 0.50 - 18.03 )    | 1.00                                   |      | G                                 | T         | T      | C         | C                   | 0.151                    | 0.91 ( 0.56 - 1.47 )                   | 1.00 |
|                    |                                   |           |        |           |                     |                          |                                        |      | G                                 | T         | T      | T         | C                   | 0.154                    | 1.46 ( 0.89 - 2.40 )                   | 1.00 |

<sup>a</sup> \* indicates all remaining allele combinations

<sup>b</sup> Odds ratios for main effects of each haplotype were calculated from unconditional logistic regression models, adjusted for smoking duration in whole years, and matching variables sex, age category, sex\*age category.

**Table S4. Odds ratios for developing SCCHN for SNP genotypes, at varying levels of lifetime alcohol consumption**

| Gene                            | SNP        | major/<br>minor<br>alleles | lifetime ethanol<br>consumption (ml) | Odds ratios in comparison to common referent group <sup>a</sup> |                                           |                                        |                                           | Assessment of<br>additive interaction<br>between SNP and<br>lifetime alcohol<br>consumption |
|---------------------------------|------------|----------------------------|--------------------------------------|-----------------------------------------------------------------|-------------------------------------------|----------------------------------------|-------------------------------------------|---------------------------------------------------------------------------------------------|
|                                 |            |                            |                                      | homozygous major allele                                         |                                           | at least one minor allele              |                                           |                                                                                             |
|                                 |            |                            |                                      | n<br>(cases/<br>controls) <sup>b</sup>                          | Adjusted odds ratio <sup>c</sup> (95% CI) | n<br>(cases/<br>controls) <sup>b</sup> | Adjusted odds ratio <sup>c</sup> (95% CI) |                                                                                             |
| <b>ALCOHOL METABOLISM GENES</b> |            |                            |                                      |                                                                 |                                           |                                        |                                           |                                                                                             |
| <b>ADH1B</b>                    | rs12507573 | C/A                        | never drinkers                       | 40 / 72                                                         | 1.00 (ref)                                | 77 / 208                               | 0.64 ( 0.39 - 1.06 )                      | -0.19                                                                                       |
|                                 |            |                            | >0 to <134,699                       | 68 / 142                                                        | 0.62 ( 0.37 - 1.05 )                      | 141 / 323                              | 0.52 ( 0.32 - 0.85 )                      |                                                                                             |
|                                 |            |                            | 134,699 to <757,550                  | 84 / 118                                                        | 0.74 ( 0.44 - 1.27 )                      | 234 / 242                              | 1.05 ( 0.65 - 1.69 )                      |                                                                                             |
|                                 |            |                            | 757,550+                             | 160 / 47                                                        | 2.75 ( 1.56 - 4.86 )                      | 345 / 126                              | 2.21 ( 1.34 - 3.65 )                      |                                                                                             |
|                                 | rs1042026  | A/G                        | never drinkers                       | 59 / 157                                                        | 1.00 (ref)                                | 58 / 123                               | 1.20 ( 0.75 - 1.93 )                      | -0.75                                                                                       |
|                                 |            |                            | >0 to <134,699                       | 112 / 253                                                       | 0.80 ( 0.53 - 1.20 )                      | 97 / 213                               | 0.85 ( 0.56 - 1.30 )                      |                                                                                             |
|                                 |            |                            | 134,699 to <757,550                  | 188 / 206                                                       | 1.48 ( 0.99 - 2.22 )                      | 130 / 154                              | 1.31 ( 0.86 - 2.01 )                      |                                                                                             |
|                                 |            |                            | 757,550+                             | 312 / 98                                                        | 3.75 ( 2.42 - 5.81 )                      | 193 / 75                               | 3.20 ( 2.02 - 5.08 )                      |                                                                                             |
|                                 | rs7673353  | C/T                        | never drinkers                       | 115 / 261                                                       | 1.00 (ref)                                | 2 / 19                                 | 0.29 ( 0.06 - 1.35 )                      | 1.06                                                                                        |
|                                 |            |                            | >0 to <134,699                       | 199 / 438                                                       | 0.72 ( 0.53 - 0.98 )                      | 10 / 28                                | 0.71 ( 0.31 - 1.62 )                      |                                                                                             |
|                                 |            |                            | 134,699 to <757,550                  | 289 / 346                                                       | 1.17 ( 0.85 - 1.60 )                      | 29 / 14                                | 3.14 ( 1.44 - 6.84 )                      |                                                                                             |
|                                 |            |                            | 757,550+                             | 453 / 159                                                       | 3.10 ( 2.19 - 4.39 )                      | 52 / 14                                | 3.44 ( 1.66 - 7.15 )                      |                                                                                             |
| rs17028834                      | T/C        | never drinkers             | 113 / 272                            | 1.00 (ref)                                                      | 4 / 8                                     | 1.13 ( 0.28 - 4.49 )                   | 3.55                                      |                                                                                             |
|                                 |            | >0 to <134,699             | 201 / 447                            | 0.75 ( 0.55 - 1.01 )                                            | 8 / 19                                    | 1.01 ( 0.40 - 2.54 )                   |                                           |                                                                                             |
|                                 |            | 134,699 to <757,550        | 303 / 342                            | 1.29 ( 0.95 - 1.77 )                                            | 15 / 18                                   | 1.39 ( 0.61 - 3.16 )                   |                                           |                                                                                             |
|                                 |            | 757,550+                   | 453 / 163                            | 3.06 ( 2.16 - 4.32 )                                            | 52 / 10                                   | 6.73 ( 3.06 - 14.81 )                  |                                           |                                                                                             |
| rs1693457                       | T/C        | never drinkers             | 78 / 177                             | 1.00 (ref)                                                      | 38 / 103                                  | 0.86 ( 0.52 - 1.41 )                   | 1.02                                      |                                                                                             |
|                                 |            | >0 to <134,699             | 146 / 295                            | 0.77 ( 0.54 - 1.11 )                                            | 63 / 170                                  | 0.64 ( 0.42 - 0.98 )                   |                                           |                                                                                             |
|                                 |            | 134,699 to <757,550        | 201 / 234                            | 1.21 ( 0.84 - 1.75 )                                            | 117 / 126                                 | 1.31 ( 0.87 - 1.98 )                   |                                           |                                                                                             |
|                                 |            | 757,550+                   | 327 / 122                            | 2.85 ( 1.92 - 4.24 )                                            | 178 / 51                                  | 3.72 ( 2.34 - 5.93 )                   |                                           |                                                                                             |
| rs1229984                       | G/A        | never drinkers             | 109 / 268                            | 1.00 (ref)                                                      | 8 / 12                                    | 1.60 ( 0.59 - 4.32 )                   | -1.85                                     |                                                                                             |
|                                 |            | >0 to <134,699             | 206 / 427                            | 0.83 ( 0.61 - 1.13 )                                            | 3 / 39                                    | 0.15 ( 0.04 - 0.50 )                   |                                           |                                                                                             |
|                                 |            | 134,699 to <757,550        | 305 / 339                            | 1.35 ( 0.98 - 1.85 )                                            | 13 / 21                                   | 1.07 ( 0.48 - 2.37 )                   |                                           |                                                                                             |
|                                 |            | 757,550+                   | 499 / 169                            | 3.36 ( 2.38 - 4.75 )                                            | 6 / 4                                     | 2.11 ( 0.49 - 9.10 )                   |                                           |                                                                                             |
| rs1159918                       | G/T        | never drinkers             | 49 / 101                             | 1.00 (ref)                                                      | 68 / 179                                  | 0.90 ( 0.55 - 1.46 )                   | 1.03                                      |                                                                                             |
|                                 |            | >0 to <134,699             | 80 / 168                             | 0.67 ( 0.41 - 1.07 )                                            | 129 / 298                                 | 0.73 ( 0.47 - 1.14 )                   |                                           |                                                                                             |
|                                 |            | 134,699 to <757,550        | 107 / 129                            | 1.11 ( 0.68 - 1.80 )                                            | 211 / 231                                 | 1.26 ( 0.81 - 1.97 )                   |                                           |                                                                                             |
|                                 |            | 757,550+                   | 140 / 58                             | 2.42 ( 1.43 - 4.08 )                                            | 365 / 115                                 | 3.34 ( 2.08 - 5.36 )                   |                                           |                                                                                             |
| rs1229982                       | G/T        | never drinkers             | 72 / 168                             | 1.00 (ref)                                                      | 45 / 112                                  | 0.91 ( 0.56 - 1.47 )                   | 0.52                                      |                                                                                             |
|                                 |            | >0 to <134,699             | 131 / 270                            | 0.79 ( 0.54 - 1.16 )                                            | 78 / 196                                  | 0.64 ( 0.42 - 0.97 )                   |                                           |                                                                                             |
|                                 |            | 134,699 to <757,550        | 180 / 211                            | 1.21 ( 0.83 - 1.79 )                                            | 138 / 149                                 | 1.28 ( 0.85 - 1.93 )                   |                                           |                                                                                             |
|                                 |            | 757,550+                   | 274 / 98                             | 2.91 ( 1.91 - 4.43 )                                            | 231 / 75                                  | 3.34 ( 2.14 - 5.21 )                   |                                           |                                                                                             |
| <b>ADH1C</b>                    | rs2298753  | T/C                        | never drinkers                       | 97 / 238                                                        | 1.00 (ref)                                | 20 / 42                                | 1.19 ( 0.63 - 2.27 )                      | -0.56                                                                                       |
|                                 |            |                            | >0 to <134,699                       | 169 / 392                                                       | 0.74 ( 0.53 - 1.03 )                      | 40 / 74                                | 0.96 ( 0.59 - 1.57 )                      |                                                                                             |
|                                 |            |                            | 134,699 to <757,550                  | 246 / 303                                                       | 1.22 ( 0.87 - 1.71 )                      | 72 / 57                                | 1.84 ( 1.16 - 2.93 )                      |                                                                                             |
|                                 |            |                            | 757,550+                             | 429 / 144                                                       | 3.34 ( 2.32 - 4.81 )                      | 76 / 29                                | 2.97 ( 1.71 - 5.16 )                      |                                                                                             |
|                                 | rs1614972  | C/T                        | never drinkers                       | 56 / 123                                                        | 1.00 (ref)                                | 61 / 157                               | 0.84 ( 0.53 - 1.34 )                      | 0.02                                                                                        |
|                                 |            |                            | >0 to <134,699                       | 81 / 219                                                        | 0.52 ( 0.33 - 0.82 )                      | 128 / 247                              | 0.84 ( 0.55 - 1.28 )                      |                                                                                             |
|                                 |            |                            | 134,699 to <757,550                  | 155 / 152                                                       | 1.33 ( 0.86 - 2.06 )                      | 163 / 208                              | 1.05 ( 0.68 - 1.61 )                      |                                                                                             |
|                                 |            |                            | 757,550+                             | 216 / 75                                                        | 2.99 ( 1.86 - 4.79 )                      | 289 / 98                               | 2.85 ( 1.80 - 4.50 )                      |                                                                                             |
|                                 | rs1391088  | C/A                        | never drinkers                       | 100 / 235                                                       | 1.00 (ref)                                | 17 / 45                                | 0.95 ( 0.50 - 1.82 )                      | 0.12                                                                                        |
|                                 |            |                            | >0 to <134,699                       | 181 / 392                                                       | 0.76 ( 0.55 - 1.06 )                      | 28 / 74                                | 0.66 ( 0.39 - 1.12 )                      |                                                                                             |
|                                 |            |                            | 134,699 to <757,550                  | 270 / 315                                                       | 1.24 ( 0.89 - 1.72 )                      | 48 / 45                                | 1.59 ( 0.95 - 2.67 )                      |                                                                                             |
|                                 |            |                            | 757,550+                             | 427 / 145                                                       | 3.18 ( 2.21 - 4.57 )                      | 78 / 28                                | 3.24 ( 1.87 - 5.62 )                      |                                                                                             |
| rs1693482                       | C/T        | never drinkers             | 44 / 123                             | 1.00 (ref)                                                      | 73 / 157                                  | 1.24 ( 0.77 - 2.01 )                   | -0.24                                     |                                                                                             |
|                                 |            | >0 to <134,699             | 84 / 199                             | 0.87 ( 0.54 - 1.38 )                                            | 124 / 265                                 | 0.85 ( 0.55 - 1.33 )                   |                                           |                                                                                             |
|                                 |            | 134,699 to <757,550        | 135 / 164                            | 1.37 ( 0.86 - 2.18 )                                            | 182 / 196                                 | 1.54 ( 0.98 - 2.41 )                   |                                           |                                                                                             |
|                                 |            | 757,550+                   | 234 / 77                             | 3.64 ( 2.22 - 5.96 )                                            | 271 / 96                                  | 3.65 ( 2.26 - 5.88 )                   |                                           |                                                                                             |
| rs1631460                       | C/G        | never drinkers             | 43 / 119                             | 1.00 (ref)                                                      | 74 / 161                                  | 1.23 ( 0.76 - 1.99 )                   | -0.17                                     |                                                                                             |
|                                 |            | >0 to <134,699             | 81 / 195                             | 0.86 ( 0.53 - 1.37 )                                            | 128 / 271                                 | 0.86 ( 0.55 - 1.34 )                   |                                           |                                                                                             |
|                                 |            | 134,699 to <757,550        | 134 / 162                            | 1.38 ( 0.87 - 2.22 )                                            | 184 / 198                                 | 1.53 ( 0.97 - 2.41 )                   |                                           |                                                                                             |
|                                 |            | 757,550+                   | 231 / 76                             | 3.61 ( 2.19 - 5.93 )                                            | 273 / 97                                  | 3.66 ( 2.26 - 5.93 )                   |                                           |                                                                                             |
| rs11936869                      | C/G        | never drinkers             | 61 / 135                             | 1.00 (ref)                                                      | 56 / 145                                  | 0.90 ( 0.56 - 1.43 )                   | -0.17                                     |                                                                                             |
|                                 |            | >0 to <134,699             | 102 / 237                            | 0.64 ( 0.42 - 0.98 )                                            | 107 / 228                                 | 0.79 ( 0.52 - 1.20 )                   |                                           |                                                                                             |
|                                 |            | 134,699 to <757,550        | 170 / 174                            | 1.37 ( 0.90 - 2.08 )                                            | 148 / 186                                 | 1.08 ( 0.71 - 1.65 )                   |                                           |                                                                                             |
|                                 |            | 757,550+                   | 242 / 78                             | 3.17 ( 2.00 - 5.02 )                                            | 263 / 95                                  | 2.90 ( 1.85 - 4.54 )                   |                                           |                                                                                             |

**Table S4. Odds ratios for developing SCCHN for SNP genotypes, at varying levels of lifetime alcohol consumption**

| Gene        | SNP        | major/<br>minor<br>alleles | lifetime ethanol<br>consumption (ml) | Odds ratios in comparison to common referent group <sup>a</sup> |                                           |                                        |                                           | Assessment of<br>additive interaction<br>between SNP and<br>lifetime alcohol<br>consumption |                                                                                                   |
|-------------|------------|----------------------------|--------------------------------------|-----------------------------------------------------------------|-------------------------------------------|----------------------------------------|-------------------------------------------|---------------------------------------------------------------------------------------------|---------------------------------------------------------------------------------------------------|
|             |            |                            |                                      | homozygous major allele                                         |                                           | at least one minor allele              |                                           |                                                                                             | ICR <sup>d</sup><br>( <b>bold</b> if statistically<br>significant after<br>Bonferroni correction) |
|             |            |                            |                                      | n<br>(cases/<br>controls) <sup>b</sup>                          | Adjusted odds ratio <sup>c</sup> (95% CI) | n<br>(cases/<br>controls) <sup>b</sup> | Adjusted odds ratio <sup>c</sup> (95% CI) |                                                                                             |                                                                                                   |
| <i>ADHA</i> | rs29001227 | A/T                        | never drinkers                       | 113 / 271                                                       | 1.00 (ref)                                | 4 / 9                                  | 1.04 ( 0.27 - 4.02 )                      | 4.55                                                                                        |                                                                                                   |
|             |            |                            | >0 to <134,699                       | 199 / 445                                                       | 0.74 ( 0.55 - 1.01 )                      | 10 / 21                                | 0.98 ( 0.41 - 2.31 )                      |                                                                                             |                                                                                                   |
|             |            |                            | 134,699 to <757,550                  | 294 / 334                                                       | 1.28 ( 0.94 - 1.76 )                      | 24 / 26                                | 1.47 ( 0.74 - 2.93 )                      |                                                                                             |                                                                                                   |
|             |            |                            | 757,550+                             | 445 / 163                                                       | 3.02 ( 2.13 - 4.27 )                      | 60 / 10                                | 7.61 ( 3.46 - 16.75 )                     |                                                                                             |                                                                                                   |
|             | rs1126672  | C/T                        | never drinkers                       | 58 / 152                                                        | 1.00 (ref)                                | 59 / 128                               | 1.19 ( 0.74 - 1.92 )                      | -0.14                                                                                       |                                                                                                   |
|             |            |                            | >0 to <134,699                       | 120 / 263                                                       | 0.84 ( 0.56 - 1.27 )                      | 89 / 203                               | 0.79 ( 0.51 - 1.22 )                      |                                                                                             |                                                                                                   |
|             |            |                            | 134,699 to <757,550                  | 186 / 214                                                       | 1.37 ( 0.91 - 2.06 )                      | 132 / 146                              | 1.46 ( 0.95 - 2.24 )                      |                                                                                             |                                                                                                   |
|             |            |                            | 757,550+                             | 310 / 107                                                       | 3.47 ( 2.24 - 5.37 )                      | 195 / 66                               | 3.53 ( 2.21 - 5.63 )                      |                                                                                             |                                                                                                   |
|             | rs4699710  | T/C                        | never drinkers                       | 49 / 142                                                        | 1.00 (ref)                                | 68 / 138                               | 1.45 ( 0.90 - 2.32 )                      | 0.09                                                                                        |                                                                                                   |
|             |            |                            | >0 to <134,699                       | 108 / 239                                                       | 0.93 ( 0.61 - 1.44 )                      | 101 / 227                              | 0.91 ( 0.58 - 1.41 )                      |                                                                                             |                                                                                                   |
|             |            |                            | 134,699 to <757,550                  | 172 / 183                                                       | 1.70 ( 1.10 - 2.63 )                      | 146 / 177                              | 1.45 ( 0.93 - 2.24 )                      |                                                                                             |                                                                                                   |
|             |            |                            | 757,550+                             | 272 / 100                                                       | 3.69 ( 2.33 - 5.85 )                      | 233 / 73                               | 4.23 ( 2.63 - 6.80 )                      |                                                                                             |                                                                                                   |
|             | rs10017466 | T/C                        | never drinkers                       | 45 / 134                                                        | 1.00 (ref)                                | 72 / 146                               | 1.46 ( 0.91 - 2.35 )                      | 1.08                                                                                        |                                                                                                   |
|             |            |                            | >0 to <134,699                       | 100 / 224                                                       | 0.93 ( 0.60 - 1.46 )                      | 109 / 242                              | 0.93 ( 0.60 - 1.45 )                      |                                                                                             |                                                                                                   |
|             |            |                            | 134,699 to <757,550                  | 154 / 163                                                       | 1.73 ( 1.11 - 2.72 )                      | 164 / 197                              | 1.49 ( 0.96 - 2.31 )                      |                                                                                             |                                                                                                   |
|             |            |                            | 757,550+                             | 223 / 93                                                        | 3.26 ( 2.03 - 5.24 )                      | 281 / 80                               | 4.80 ( 2.98 - 7.72 )                      |                                                                                             |                                                                                                   |
|             | rs1800759  | C/A                        | never drinkers                       | 35 / 93                                                         | 1.00 (ref)                                | 82 / 187                               | 1.17 ( 0.70 - 1.95 )                      | 0.66                                                                                        |                                                                                                   |
|             |            |                            | >0 to <134,699                       | 70 / 153                                                        | 0.80 ( 0.47 - 1.36 )                      | 139 / 313                              | 0.86 ( 0.53 - 1.39 )                      |                                                                                             |                                                                                                   |
|             |            |                            | 134,699 to <757,550                  | 101 / 104                                                       | 1.61 ( 0.95 - 2.73 )                      | 217 / 256                              | 1.37 ( 0.85 - 2.22 )                      |                                                                                             |                                                                                                   |
|             |            |                            | 757,550+                             | 132 / 55                                                        | 3.02 ( 1.72 - 5.31 )                      | 373 / 118                              | 3.85 ( 2.32 - 6.41 )                      |                                                                                             |                                                                                                   |
|             | rs1800761  | G/A                        | never drinkers                       | 68 / 167                                                        | 1.00 (ref)                                | 49 / 113                               | 1.13 ( 0.70 - 1.81 )                      | -0.63                                                                                       |                                                                                                   |
|             |            |                            | >0 to <134,699                       | 121 / 300                                                       | 0.70 ( 0.48 - 1.04 )                      | 88 / 166                               | 0.95 ( 0.63 - 1.44 )                      |                                                                                             |                                                                                                   |
|             |            |                            | 134,699 to <757,550                  | 208 / 235                                                       | 1.39 ( 0.95 - 2.04 )                      | 110 / 125                              | 1.29 ( 0.84 - 1.98 )                      |                                                                                             |                                                                                                   |
|             |            |                            | 757,550+                             | 310 / 101                                                       | 3.57 ( 2.35 - 5.45 )                      | 195 / 72                               | 3.07 ( 1.95 - 4.83 )                      |                                                                                             |                                                                                                   |
| rs3762894   | T/C        | never drinkers             | 82 / 178                             | 1.00 (ref)                                                      | 35 / 102                                  | 0.75 ( 0.45 - 1.23 )                   | -0.74                                     |                                                                                             |                                                                                                   |
|             |            | >0 to <134,699             | 135 / 328                            | 0.62 ( 0.43 - 0.89 )                                            | 74 / 138                                  | 0.83 ( 0.55 - 1.27 )                   |                                           |                                                                                             |                                                                                                   |
|             |            | 134,699 to <757,550        | 226 / 263                            | 1.15 ( 0.80 - 1.65 )                                            | 92 / 97                                   | 1.22 ( 0.79 - 1.88 )                   |                                           |                                                                                             |                                                                                                   |
|             |            | 757,550+                   | 348 / 108                            | 3.28 ( 2.19 - 4.89 )                                            | 157 / 65                                  | 2.29 ( 1.45 - 3.60 )                   |                                           |                                                                                             |                                                                                                   |
| <i>ADH7</i> | rs284787   | C/T                        | never drinkers                       | 67 / 166                                                        | 1.00 (ref)                                | 50 / 114                               | 1.05 ( 0.65 - 1.68 )                      | 0.45                                                                                        |                                                                                                   |
|             |            |                            | >0 to <134,699                       | 127 / 299                                                       | 0.74 ( 0.50 - 1.08 )                      | 82 / 167                               | 0.83 ( 0.54 - 1.27 )                      |                                                                                             |                                                                                                   |
|             |            |                            | 134,699 to <757,550                  | 195 / 210                                                       | 1.36 ( 0.92 - 2.01 )                      | 123 / 150                              | 1.26 ( 0.83 - 1.92 )                      |                                                                                             |                                                                                                   |
|             |            |                            | 757,550+                             | 308 / 112                                                       | 3.11 ( 2.05 - 4.72 )                      | 197 / 61                               | 3.61 ( 2.26 - 5.74 )                      |                                                                                             |                                                                                                   |
|             | rs894369   | C/G                        | never drinkers                       | 84 / 181                                                        | 1.00 (ref)                                | 33 / 99                                | 0.71 ( 0.42 - 1.17 )                      | 0.80                                                                                        |                                                                                                   |
|             |            |                            | >0 to <134,699                       | 140 / 303                                                       | 0.70 ( 0.48 - 1.00 )                      | 69 / 162                               | 0.63 ( 0.42 - 0.96 )                      |                                                                                             |                                                                                                   |
|             |            |                            | 134,699 to <757,550                  | 207 / 214                                                       | 1.26 ( 0.87 - 1.83 )                      | 111 / 146                              | 1.00 ( 0.67 - 1.50 )                      |                                                                                             |                                                                                                   |
|             |            |                            | 757,550+                             | 350 / 125                                                       | 2.75 ( 1.85 - 4.07 )                      | 155 / 48                               | 3.25 ( 2.02 - 5.22 )                      |                                                                                             |                                                                                                   |
|             | rs17588403 | T/A                        | never drinkers                       | 71 / 190                                                        | 1.00 (ref)                                | 46 / 90                                | 1.35 ( 0.83 - 2.19 )                      | -1.33                                                                                       |                                                                                                   |
|             |            |                            | >0 to <134,699                       | 142 / 307                                                       | 0.87 ( 0.60 - 1.25 )                      | 67 / 159                               | 0.78 ( 0.51 - 1.21 )                      |                                                                                             |                                                                                                   |
|             |            |                            | 134,699 to <757,550                  | 226 / 251                                                       | 1.49 ( 1.03 - 2.16 )                      | 92 / 109                               | 1.32 ( 0.85 - 2.05 )                      |                                                                                             |                                                                                                   |
|             |            |                            | 757,550+                             | 347 / 108                                                       | 3.96 ( 2.63 - 5.96 )                      | 158 / 65                               | 2.97 ( 1.88 - 4.69 )                      |                                                                                             |                                                                                                   |
|             | rs1154454  | T/C                        | never drinkers                       | 76 / 175                                                        | 1.00 (ref)                                | 41 / 105                               | 0.85 ( 0.52 - 1.39 )                      | 0.13                                                                                        |                                                                                                   |
|             |            |                            | >0 to <134,699                       | 143 / 276                                                       | 0.82 ( 0.57 - 1.19 )                      | 66 / 190                               | 0.55 ( 0.36 - 0.84 )                      |                                                                                             |                                                                                                   |
|             |            |                            | 134,699 to <757,550                  | 191 / 227                                                       | 1.16 ( 0.80 - 1.70 )                      | 127 / 133                              | 1.31 ( 0.86 - 1.98 )                      |                                                                                             |                                                                                                   |
|             |            |                            | 757,550+                             | 306 / 106                                                       | 3.04 ( 2.02 - 4.58 )                      | 199 / 67                               | 3.02 ( 1.91 - 4.77 )                      |                                                                                             |                                                                                                   |
|             | rs1154456  | T/C                        | never drinkers                       | 54 / 125                                                        | 1.00 (ref)                                | 63 / 155                               | 0.77 ( 0.48 - 1.22 )                      | -0.03                                                                                       |                                                                                                   |
|             |            |                            | >0 to <134,699                       | 91 / 218                                                        | 0.62 ( 0.40 - 0.96 )                      | 118 / 248                              | 0.68 ( 0.44 - 1.04 )                      |                                                                                             |                                                                                                   |
|             |            |                            | 134,699 to <757,550                  | 149 / 181                                                       | 1.03 ( 0.67 - 1.59 )                      | 169 / 179                              | 1.20 ( 0.78 - 1.85 )                      |                                                                                             |                                                                                                   |
|             |            |                            | 757,550+                             | 256 / 81                                                        | 2.91 ( 1.82 - 4.65 )                      | 249 / 92                               | 2.65 ( 1.67 - 4.20 )                      |                                                                                             |                                                                                                   |
|             | rs1154460  | G/A                        | never drinkers                       | 35 / 65                                                         | 1.00 (ref)                                | 81 / 215                               | 0.63 ( 0.37 - 1.07 )                      | 0.92                                                                                        |                                                                                                   |
|             |            |                            | >0 to <134,699                       | 57 / 131                                                        | 0.53 ( 0.30 - 0.92 )                      | 152 / 334                              | 0.55 ( 0.34 - 0.90 )                      |                                                                                             |                                                                                                   |
|             |            |                            | 134,699 to <757,550                  | 88 / 111                                                        | 0.83 ( 0.48 - 1.45 )                      | 229 / 249                              | 0.97 ( 0.59 - 1.60 )                      |                                                                                             |                                                                                                   |
|             |            |                            | 757,550+                             | 133 / 54                                                        | 1.93 ( 1.07 - 3.46 )                      | 371 / 119                              | 2.48 ( 1.47 - 4.20 )                      |                                                                                             |                                                                                                   |
| rs971074    | G/A        | never drinkers             | 91 / 219                             | 1.00 (ref)                                                      | 26 / 61                                   | 1.15 ( 0.65 - 2.03 )                   | 0.86                                      |                                                                                             |                                                                                                   |
|             |            | >0 to <134,699             | 166 / 357                            | 0.79 ( 0.56 - 1.11 )                                            | 43 / 109                                  | 0.73 ( 0.46 - 1.17 )                   |                                           |                                                                                             |                                                                                                   |
|             |            | 134,699 to <757,550        | 247 / 275                            | 1.34 ( 0.95 - 1.89 )                                            | 71 / 85                                   | 1.31 ( 0.84 - 2.05 )                   |                                           |                                                                                             |                                                                                                   |
|             |            | 757,550+                   | 380 / 140                            | 3.13 ( 2.15 - 4.55 )                                            | 125 / 33                                  | 4.14 ( 2.47 - 6.94 )                   |                                           |                                                                                             |                                                                                                   |
| rs1573496   | C/G        | never drinkers             | 98 / 236                             | 1.00 (ref)                                                      | 19 / 44                                   | 1.08 ( 0.57 - 2.05 )                   | 0.46                                      |                                                                                             |                                                                                                   |
|             |            | >0 to <134,699             | 175 / 386                            | 0.76 ( 0.55 - 1.06 )                                            | 34 / 80                                   | 0.76 ( 0.46 - 1.27 )                   |                                           |                                                                                             |                                                                                                   |
|             |            | 134,699 to <757,550        | 272 / 301                            | 1.31 ( 0.94 - 1.83 )                                            | 46 / 59                                   | 1.29 ( 0.78 - 2.13 )                   |                                           |                                                                                             |                                                                                                   |
|             |            | 757,550+                   | 446 / 155                            | 3.20 ( 2.23 - 4.59 )                                            | 58 / 18                                   | 3.73 ( 1.98 - 7.05 )                   |                                           |                                                                                             |                                                                                                   |

**Table S4. Odds ratios for developing SCCHN for SNP genotypes, at varying levels of lifetime alcohol consumption**

| Gene          | SNP        | major/<br>minor<br>alleles | lifetime ethanol<br>consumption (ml) | Odds ratios in comparison to common referent group <sup>a</sup> |                                           |                                        |                                           | Assessment of<br>additive interaction<br>between SNP and<br>lifetime alcohol<br>consumption |
|---------------|------------|----------------------------|--------------------------------------|-----------------------------------------------------------------|-------------------------------------------|----------------------------------------|-------------------------------------------|---------------------------------------------------------------------------------------------|
|               |            |                            |                                      | homozygous major allele                                         |                                           | at least one minor allele              |                                           |                                                                                             |
|               |            |                            |                                      | n<br>(cases/<br>controls) <sup>b</sup>                          | Adjusted odds ratio <sup>c</sup> (95% CI) | n<br>(cases/<br>controls) <sup>b</sup> | Adjusted odds ratio <sup>c</sup> (95% CI) |                                                                                             |
| <i>ALDH2</i>  | rs4767939  | A/G                        | never drinkers                       | 76 / 174                                                        | 1.00 (ref)                                | 41 / 106                               | 0.88 ( 0.54 - 1.44 )                      | 1.09                                                                                        |
|               |            |                            | >0 to <134,699                       | 120 / 289                                                       | 0.65 ( 0.44 - 0.94 )                      | 89 / 177                               | 0.84 ( 0.56 - 1.27 )                      |                                                                                             |
|               |            |                            | 134,699 to <757,550                  | 194 / 218                                                       | 1.21 ( 0.83 - 1.77 )                      | 124 / 142                              | 1.28 ( 0.85 - 1.93 )                      |                                                                                             |
|               |            |                            | 757,550+                             | 261 / 103                                                       | 2.69 ( 1.78 - 4.07 )                      | 243 / 70                               | 3.66 ( 2.35 - 5.71 )                      |                                                                                             |
|               | rs2238151  | T/C                        | never drinkers                       | 50 / 95                                                         | 1.00 (ref)                                | 67 / 184                               | 0.70 ( 0.43 - 1.14 )                      | <b>1.91</b>                                                                                 |
|               |            |                            | >0 to <134,699                       | 75 / 173                                                        | 0.54 ( 0.34 - 0.88 )                      | 133 / 293                              | 0.64 ( 0.41 - 0.99 )                      |                                                                                             |
|               |            |                            | 134,699 to <757,550                  | 97 / 138                                                        | 0.81 ( 0.50 - 1.31 )                      | 220 / 222                              | 1.19 ( 0.76 - 1.86 )                      |                                                                                             |
|               |            |                            | 757,550+                             | 122 / 65                                                        | 1.66 ( 0.99 - 2.80 )                      | 381 / 106                              | 3.27 ( 2.02 - 5.28 )                      |                                                                                             |
|               | rs7312055  | G/A                        | never drinkers                       | 111 / 254                                                       | 1.00 (ref)                                | 6 / 26                                 | 0.41 ( 0.15 - 1.12 )                      | 0.97                                                                                        |
|               |            |                            | >0 to <134,699                       | 201 / 427                                                       | 0.74 ( 0.54 - 1.01 )                      | 8 / 39                                 | 0.32 ( 0.13 - 0.78 )                      |                                                                                             |
|               |            |                            | 134,699 to <757,550                  | 282 / 328                                                       | 1.19 ( 0.87 - 1.64 )                      | 36 / 32                                | 1.30 ( 0.69 - 2.46 )                      |                                                                                             |
|               |            |                            | 757,550+                             | 422 / 152                                                       | 2.93 ( 2.06 - 4.17 )                      | 83 / 21                                | 3.31 ( 1.76 - 6.23 )                      |                                                                                             |
|               | rs2158029  | G/A                        | never drinkers                       | 116 / 270                                                       | 1.00 (ref)                                | 1 / 10                                 | 0.28 ( 0.03 - 2.30 )                      | 2.73                                                                                        |
|               |            |                            | >0 to <134,699                       | 207 / 443                                                       | 0.77 ( 0.57 - 1.04 )                      | 2 / 23                                 | 0.13 ( 0.03 - 0.60 )                      |                                                                                             |
|               |            |                            | 134,699 to <757,550                  | 302 / 349                                                       | 1.25 ( 0.91 - 1.70 )                      | 16 / 11                                | 1.79 ( 0.72 - 4.45 )                      |                                                                                             |
|               |            |                            | 757,550+                             | 470 / 166                                                       | 3.09 ( 2.19 - 4.35 )                      | 35 / 7                                 | 5.10 ( 2.04 - 12.73 )                     |                                                                                             |
|               | rs16941667 | C/T                        | never drinkers                       | 98 / 233                                                        | 1.00 (ref)                                | 19 / 47                                | 1.06 ( 0.57 - 1.99 )                      | 0.99                                                                                        |
|               |            |                            | >0 to <134,699                       | 163 / 390                                                       | 0.70 ( 0.50 - 0.98 )                      | 46 / 75                                | 1.11 ( 0.69 - 1.79 )                      |                                                                                             |
|               |            |                            | 134,699 to <757,550                  | 259 / 294                                                       | 1.29 ( 0.92 - 1.80 )                      | 59 / 66                                | 1.42 ( 0.89 - 2.29 )                      |                                                                                             |
|               |            |                            | 757,550+                             | 405 / 148                                                       | 3.12 ( 2.17 - 4.49 )                      | 100 / 25                               | 4.17 ( 2.39 - 7.28 )                      |                                                                                             |
| rs16941669    | T/G        | never drinkers             | 97 / 218                             | 1.00 (ref)                                                      | 20 / 61                                   | 0.74 ( 0.41 - 1.34 )                   | 1.45                                      |                                                                                             |
|               |            | >0 to <134,699             | 162 / 380                            | 0.67 ( 0.48 - 0.94 )                                            | 47 / 86                                   | 0.88 ( 0.55 - 1.39 )                   |                                           |                                                                                             |
|               |            | 134,699 to <757,550        | 254 / 302                            | 1.17 ( 0.84 - 1.64 )                                            | 64 / 58                                   | 1.46 ( 0.90 - 2.35 )                   |                                           |                                                                                             |
|               |            | 757,550+                   | 415 / 149                            | 2.90 ( 2.01 - 4.18 )                                            | 90 / 23                                   | 4.09 ( 2.30 - 7.26 )                   |                                           |                                                                                             |
| <i>CYP2E1</i> | rs3813865  | G/C                        | never drinkers                       | 108 / 259                                                       | 1.00 (ref)                                | 9 / 20                                 | 1.24 ( 0.51 - 3.00 )                      | 1.95                                                                                        |
|               |            |                            | >0 to <134,699                       | 196 / 432                                                       | 0.76 ( 0.56 - 1.04 )                      | 13 / 34                                | 0.75 ( 0.37 - 1.54 )                      |                                                                                             |
|               |            |                            | 134,699 to <757,550                  | 289 / 324                                                       | 1.32 ( 0.96 - 1.82 )                      | 29 / 36                                | 1.27 ( 0.69 - 2.31 )                      |                                                                                             |
|               |            |                            | 757,550+                             | 437 / 160                                                       | 3.11 ( 2.19 - 4.42 )                      | 68 / 13                                | 5.31 ( 2.65 - 10.65 )                     |                                                                                             |
|               | rs3813867  | G/C                        | never drinkers                       | 110 / 263                                                       | 1.00 (ref)                                | 7 / 16                                 | 0.94 ( 0.35 - 2.47 )                      | 3.88                                                                                        |
|               |            |                            | >0 to <134,699                       | 197 / 441                                                       | 0.74 ( 0.54 - 1.01 )                      | 12 / 25                                | 0.80 ( 0.37 - 1.76 )                      |                                                                                             |
|               |            |                            | 134,699 to <757,550                  | 301 / 329                                                       | 1.35 ( 0.98 - 1.85 )                      | 17 / 31                                | 0.65 ( 0.33 - 1.28 )                      |                                                                                             |
|               |            |                            | 757,550+                             | 460 / 165                                                       | 3.00 ( 2.11 - 4.25 )                      | 44 / 8                                 | 6.82 ( 2.90 - 16.02 )                     |                                                                                             |
|               | rs8192772  | T/C                        | never drinkers                       | 99 / 237                                                        | 1.00 (ref)                                | 18 / 43                                | 1.07 ( 0.55 - 2.05 )                      | 1.89                                                                                        |
|               |            |                            | >0 to <134,699                       | 179 / 394                                                       | 0.75 ( 0.54 - 1.03 )                      | 30 / 72                                | 0.84 ( 0.50 - 1.41 )                      |                                                                                             |
|               |            |                            | 134,699 to <757,550                  | 264 / 294                                                       | 1.30 ( 0.94 - 1.81 )                      | 53 / 66                                | 1.29 ( 0.80 - 2.08 )                      |                                                                                             |
|               |            |                            | 757,550+                             | 413 / 152                                                       | 3.02 ( 2.11 - 4.33 )                      | 92 / 21                                | 4.97 ( 2.78 - 8.91 )                      |                                                                                             |
|               | rs915908   | G/A                        | never drinkers                       | 93 / 216                                                        | 1.00 (ref)                                | 24 / 64                                | 1.04 ( 0.59 - 1.85 )                      | -1.29                                                                                       |
|               |            |                            | >0 to <134,699                       | 152 / 352                                                       | 0.74 ( 0.53 - 1.04 )                      | 57 / 114                               | 0.80 ( 0.52 - 1.24 )                      |                                                                                             |
|               |            |                            | 134,699 to <757,550                  | 254 / 277                                                       | 1.35 ( 0.96 - 1.91 )                      | 64 / 83                                | 1.12 ( 0.71 - 1.77 )                      |                                                                                             |
|               |            |                            | 757,550+                             | 417 / 131                                                       | 3.56 ( 2.45 - 5.17 )                      | 88 / 42                                | 2.31 ( 1.39 - 3.82 )                      |                                                                                             |
|               | rs915909   | C/T                        | never drinkers                       | 115 / 270                                                       | 1.00 (ref)                                | 2 / 9                                  | 0.62 ( 0.12 - 3.24 )                      | 0.80                                                                                        |
|               |            |                            | >0 to <134,699                       | 206 / 449                                                       | 0.76 ( 0.56 - 1.03 )                      | 3 / 15                                 | 0.35 ( 0.09 - 1.30 )                      |                                                                                             |
|               |            |                            | 134,699 to <757,550                  | 302 / 348                                                       | 1.26 ( 0.92 - 1.71 )                      | 16 / 12                                | 1.74 ( 0.71 - 4.24 )                      |                                                                                             |
|               |            |                            | 757,550+                             | 468 / 163                                                       | 3.15 ( 2.23 - 4.44 )                      | 36 / 9                                 | 3.56 ( 1.56 - 8.17 )                      |                                                                                             |
| rs7092584     | C/T        | never drinkers             | 92 / 223                             | 1.00 (ref)                                                      | 25 / 57                                   | 1.17 ( 0.66 - 2.07 )                   | 1.06                                      |                                                                                             |
|               |            | >0 to <134,699             | 167 / 375                            | 0.75 ( 0.54 - 1.05 )                                            | 42 / 91                                   | 0.89 ( 0.56 - 1.44 )                   |                                           |                                                                                             |
|               |            | 134,699 to <757,550        | 252 / 279                            | 1.36 ( 0.97 - 1.92 )                                            | 65 / 80                                   | 1.24 ( 0.79 - 1.94 )                   |                                           |                                                                                             |
|               |            | 757,550+                   | 384 / 142                            | 3.10 ( 2.14 - 4.49 )                                            | 120 / 31                                  | 4.33 ( 2.58 - 7.26 )                   |                                           |                                                                                             |
| rs743535      | C/T        | never drinkers             | 95 / 223                             | 1.00 (ref)                                                      | 22 / 53                                   | 0.93 ( 0.51 - 1.69 )                   | 2.26                                      |                                                                                             |
|               |            | >0 to <134,699             | 169 / 386                            | 0.70 ( 0.50 - 0.98 )                                            | 40 / 78                                   | 0.91 ( 0.56 - 1.49 )                   |                                           |                                                                                             |
|               |            | 134,699 to <757,550        | 252 / 279                            | 1.29 ( 0.92 - 1.81 )                                            | 60 / 80                                   | 1.04 ( 0.66 - 1.65 )                   |                                           |                                                                                             |
|               |            | 757,550+                   | 386 / 147                            | 2.79 ( 1.93 - 4.04 )                                            | 116 / 26                                  | 4.98 ( 2.89 - 8.59 )                   |                                           |                                                                                             |
| rs2249695     | C/T        | never drinkers             | 73 / 136                             | 1.00 (ref)                                                      | 44 / 144                                  | 0.56 ( 0.35 - 0.91 )                   | 1.21                                      |                                                                                             |
|               |            | >0 to <134,699             | 127 / 253                            | 0.63 ( 0.43 - 0.94 )                                            | 82 / 213                                  | 0.52 ( 0.34 - 0.80 )                   |                                           |                                                                                             |
|               |            | 134,699 to <757,550        | 160 / 178                            | 1.06 ( 0.71 - 1.59 )                                            | 158 / 181                                 | 0.95 ( 0.63 - 1.43 )                   |                                           |                                                                                             |
|               |            | 757,550+                   | 218 / 92                             | 2.12 ( 1.37 - 3.28 )                                            | 286 / 81                                  | 2.89 ( 1.83 - 4.55 )                   |                                           |                                                                                             |
| rs28969387    | A/T        | never drinkers             | 115 / 275                            | 1.00 (ref)                                                      | 2 / 5                                     | 1.03 ( 0.16 - 6.58 )                   | 0.05                                      |                                                                                             |
|               |            | >0 to <134,699             | 206 / 464                            | 0.75 ( 0.55 - 1.01 )                                            | 3 / 2                                     | 2.25 ( 0.33 - 15.13 )                  |                                           |                                                                                             |
|               |            | 134,699 to <757,550        | 311 / 353                            | 1.30 ( 0.95 - 1.77 )                                            | 7 / 7                                     | 1.06 ( 0.33 - 3.38 )                   |                                           |                                                                                             |
|               |            | 757,550+                   | 493 / 170                            | 3.22 ( 2.29 - 4.54 )                                            | 12 / 3                                    | 3.30 ( 0.88 - 12.40 )                  |                                           |                                                                                             |

**Table S4. Odds ratios for developing SCCHN for SNP genotypes, at varying levels of lifetime alcohol consumption**

| Gene                                     | SNP        | major/<br>minor<br>alleles | lifetime ethanol<br>consumption (ml) | Odds ratios in comparison to common referent group <sup>a</sup> |                                           |                                        |                                           | Assessment of<br>additive interaction<br>between SNP and<br>lifetime alcohol<br>consumption |
|------------------------------------------|------------|----------------------------|--------------------------------------|-----------------------------------------------------------------|-------------------------------------------|----------------------------------------|-------------------------------------------|---------------------------------------------------------------------------------------------|
|                                          |            |                            |                                      | homozygous major allele                                         |                                           | at least one minor allele              |                                           |                                                                                             |
|                                          |            |                            |                                      | n<br>(cases/<br>controls) <sup>b</sup>                          | Adjusted odds ratio <sup>c</sup> (95% CI) | n<br>(cases/<br>controls) <sup>b</sup> | Adjusted odds ratio <sup>c</sup> (95% CI) |                                                                                             |
|                                          | rs11101812 | T/C                        | never drinkers                       | 115 / 275                                                       | 1.00 (ref)                                | 1 / 5                                  | 0.41 ( 0.04 - 3.90 )                      | 19.34                                                                                       |
|                                          |            |                            | >0 to <134,699                       | 205 / 463                                                       | 0.74 ( 0.55 - 1.00 )                      | 4 / 3                                  | 2.70 ( 0.52 - 14.05 )                     |                                                                                             |
|                                          |            |                            | 134,699 to <757,550                  | 312 / 348                                                       | 1.31 ( 0.96 - 1.79 )                      | 5 / 10                                 | 0.67 ( 0.20 - 2.23 )                      |                                                                                             |
|                                          |            |                            | 757,550+                             | 489 / 172                                                       | 3.10 ( 2.20 - 4.36 )                      | 15 / 1                                 | 21.85 ( 2.60 - 183.30 )                   |                                                                                             |
| <b>OXIDATIVE STRESS METABOLISM GENES</b> |            |                            |                                      |                                                                 |                                           |                                        |                                           |                                                                                             |
| <b>CAT</b>                               | rs1049982  | C/T                        | never drinkers                       | 60 / 137                                                        | 1.00 (ref)                                | 57 / 140                               | 1.10 ( 0.69 - 1.77 )                      | -0.15                                                                                       |
|                                          |            |                            | >0 to <134,699                       | 95 / 216                                                        | 0.75 ( 0.49 - 1.15 )                      | 114 / 247                              | 0.81 ( 0.54 - 1.22 )                      |                                                                                             |
|                                          |            |                            | 134,699 to <757,550                  | 135 / 150                                                       | 1.41 ( 0.92 - 2.16 )                      | 183 / 209                              | 1.29 ( 0.85 - 1.94 )                      |                                                                                             |
|                                          |            |                            | 757,550+                             | 200 / 71                                                        | 3.33 ( 2.10 - 5.28 )                      | 303 / 102                              | 3.28 ( 2.12 - 5.07 )                      |                                                                                             |
| <b>GPX1</b>                              | rs8179172  | T/A                        | never drinkers                       | 116 / 270                                                       | 1.00 (ref)                                | 1 / 10                                 | 0.14 ( 0.02 - 1.25 )                      | 0.16                                                                                        |
|                                          |            |                            | >0 to <134,699                       | 205 / 450                                                       | 0.73 ( 0.54 - 0.99 )                      | 4 / 16                                 | 0.44 ( 0.13 - 1.46 )                      |                                                                                             |
|                                          |            |                            | 134,699 to <757,550                  | 305 / 349                                                       | 1.21 ( 0.88 - 1.65 )                      | 13 / 11                                | 2.15 ( 0.85 - 5.44 )                      |                                                                                             |
|                                          |            |                            | 757,550+                             | 475 / 160                                                       | 3.10 ( 2.19 - 4.38 )                      | 30 / 13                                | 2.40 ( 1.10 - 5.27 )                      |                                                                                             |
|                                          | rs1800668  | C/T                        | never drinkers                       | 56 / 146                                                        | 1.00 (ref)                                | 61 / 132                               | 1.16 ( 0.73 - 1.85 )                      | 0.37                                                                                        |
|                                          |            |                            | >0 to <134,699                       | 97 / 222                                                        | 0.76 ( 0.50 - 1.16 )                      | 112 / 243                              | 0.85 ( 0.56 - 1.29 )                      |                                                                                             |
|                                          |            |                            | 134,699 to <757,550                  | 178 / 185                                                       | 1.43 ( 0.94 - 2.16 )                      | 140 / 175                              | 1.33 ( 0.87 - 2.04 )                      |                                                                                             |
|                                          |            |                            | 757,550+                             | 272 / 95                                                        | 3.23 ( 2.07 - 5.05 )                      | 233 / 77                               | 3.75 ( 2.37 - 5.95 )                      |                                                                                             |
|                                          | rs3811699  | A/G                        | never drinkers                       | 55 / 142                                                        | 1.00 (ref)                                | 62 / 138                               | 1.14 ( 0.72 - 1.82 )                      | 0.37                                                                                        |
|                                          |            |                            | >0 to <134,699                       | 95 / 216                                                        | 0.76 ( 0.50 - 1.17 )                      | 114 / 250                              | 0.85 ( 0.56 - 1.29 )                      |                                                                                             |
|                                          |            |                            | 134,699 to <757,550                  | 171 / 176                                                       | 1.45 ( 0.95 - 2.21 )                      | 147 / 184                              | 1.31 ( 0.86 - 2.01 )                      |                                                                                             |
|                                          |            |                            | 757,550+                             | 258 / 91                                                        | 3.21 ( 2.04 - 5.04 )                      | 247 / 82                               | 3.71 ( 2.35 - 5.88 )                      |                                                                                             |
|                                          | rs3448     | C/T                        | never drinkers                       | 60 / 158                                                        | 1.00 (ref)                                | 57 / 122                               | 1.27 ( 0.80 - 2.03 )                      | 0.32                                                                                        |
|                                          |            |                            | >0 to <134,699                       | 116 / 256                                                       | 0.84 ( 0.56 - 1.26 )                      | 93 / 210                               | 0.84 ( 0.55 - 1.28 )                      |                                                                                             |
|                                          |            |                            | 134,699 to <757,550                  | 157 / 192                                                       | 1.35 ( 0.89 - 2.03 )                      | 161 / 168                              | 1.55 ( 1.03 - 2.34 )                      |                                                                                             |
|                                          |            |                            | 757,550+                             | 273 / 105                                                       | 3.34 ( 2.17 - 5.14 )                      | 232 / 68                               | 3.93 ( 2.49 - 6.22 )                      |                                                                                             |
| <b>GPX2</b>                              | rs11623705 | G/T                        | never drinkers                       | 86 / 232                                                        | 1.00 (ref)                                | 31 / 48                                | 1.58 ( 0.90 - 2.77 )                      | -0.76                                                                                       |
|                                          |            |                            | >0 to <134,699                       | 166 / 367                                                       | 0.83 ( 0.59 - 1.17 )                      | 43 / 99                                | 0.83 ( 0.52 - 1.32 )                      |                                                                                             |
|                                          |            |                            | 134,699 to <757,550                  | 263 / 292                                                       | 1.47 ( 1.05 - 2.08 )                      | 55 / 68                                | 1.24 ( 0.77 - 2.01 )                      |                                                                                             |
|                                          |            |                            | 757,550+                             | 421 / 142                                                       | 3.60 ( 2.47 - 5.24 )                      | 84 / 31                                | 3.41 ( 2.00 - 5.84 )                      |                                                                                             |
|                                          | rs2412065  | G/C                        | never drinkers                       | 67 / 158                                                        | 1.00 (ref)                                | 50 / 122                               | 1.00 ( 0.62 - 1.60 )                      | 0.06                                                                                        |
|                                          |            |                            | >0 to <134,699                       | 126 / 251                                                       | 0.85 ( 0.57 - 1.26 )                      | 83 / 215                               | 0.65 ( 0.43 - 0.99 )                      |                                                                                             |
|                                          |            |                            | 134,699 to <757,550                  | 186 / 204                                                       | 1.32 ( 0.89 - 1.96 )                      | 132 / 156                              | 1.25 ( 0.82 - 1.90 )                      |                                                                                             |
|                                          |            |                            | 757,550+                             | 278 / 99                                                        | 3.18 ( 2.07 - 4.88 )                      | 227 / 74                               | 3.24 ( 2.06 - 5.10 )                      |                                                                                             |
|                                          | rs2737844  | C/T                        | never drinkers                       | 58 / 117                                                        | 1.00 (ref)                                | 59 / 161                               | 0.76 ( 0.48 - 1.22 )                      | 0.03                                                                                        |
|                                          |            |                            | >0 to <134,699                       | 100 / 173                                                       | 0.84 ( 0.54 - 1.30 )                      | 108 / 292                              | 0.54 ( 0.35 - 0.82 )                      |                                                                                             |
|                                          |            |                            | 134,699 to <757,550                  | 129 / 147                                                       | 1.09 ( 0.70 - 1.70 )                      | 188 / 211                              | 1.12 ( 0.73 - 1.72 )                      |                                                                                             |
|                                          |            |                            | 757,550+                             | 180 / 62                                                        | 2.84 ( 1.73 - 4.65 )                      | 322 / 111                              | 2.63 ( 1.66 - 4.16 )                      |                                                                                             |
| <b>GPX4</b>                              | rs757229   | G/C                        | never drinkers                       | 35 / 83                                                         | 1.00 (ref)                                | 82 / 197                               | 0.92 ( 0.55 - 1.52 )                      | 0.09                                                                                        |
|                                          |            |                            | >0 to <134,699                       | 58 / 114                                                        | 0.74 ( 0.43 - 1.28 )                      | 150 / 352                              | 0.69 ( 0.43 - 1.12 )                      |                                                                                             |
|                                          |            |                            | 134,699 to <757,550                  | 67 / 109                                                        | 0.90 ( 0.52 - 1.56 )                      | 251 / 251                              | 1.34 ( 0.83 - 2.17 )                      |                                                                                             |
|                                          |            |                            | 757,550+                             | 116 / 40                                                        | 3.05 ( 1.68 - 5.54 )                      | 389 / 132                              | 3.05 ( 1.84 - 5.06 )                      |                                                                                             |
| <b>SOD1</b>                              | rs11910115 | A/C                        | never drinkers                       | 116 / 271                                                       | 1.00 (ref)                                | 1 / 9                                  | 0.31 ( 0.03 - 2.91 )                      | 2.22                                                                                        |
|                                          |            |                            | >0 to <134,699                       | 205 / 441                                                       | 0.76 ( 0.56 - 1.04 )                      | 4 / 25                                 | 0.27 ( 0.08 - 0.92 )                      |                                                                                             |
|                                          |            |                            | 134,699 to <757,550                  | 299 / 340                                                       | 1.27 ( 0.93 - 1.73 )                      | 19 / 20                                | 1.33 ( 0.62 - 2.85 )                      |                                                                                             |
|                                          |            |                            | 757,550+                             | 469 / 165                                                       | 3.09 ( 2.19 - 4.35 )                      | 36 / 8                                 | 4.63 ( 1.94 - 11.06 )                     |                                                                                             |
|                                          | rs4998557  | G/A                        | never drinkers                       | 85 / 202                                                        | 1.00 (ref)                                | 32 / 78                                | 0.91 ( 0.54 - 1.53 )                      | 1.51                                                                                        |
|                                          |            |                            | >0 to <134,699                       | 157 / 341                                                       | 0.75 ( 0.53 - 1.07 )                      | 52 / 122                               | 0.69 ( 0.44 - 1.09 )                      |                                                                                             |
|                                          |            |                            | 134,699 to <757,550                  | 208 / 258                                                       | 1.15 ( 0.80 - 1.64 )                      | 110 / 102                              | 1.53 ( 1.00 - 2.34 )                      |                                                                                             |
|                                          |            |                            | 757,550+                             | 328 / 124                                                       | 2.76 ( 1.87 - 4.08 )                      | 176 / 49                               | 4.18 ( 2.60 - 6.72 )                      |                                                                                             |
|                                          | rs10432782 | T/G                        | never drinkers                       | 86 / 208                                                        | 1.00 (ref)                                | 31 / 72                                | 0.95 ( 0.56 - 1.61 )                      | 1.15                                                                                        |
|                                          |            |                            | >0 to <134,699                       | 162 / 351                                                       | 0.77 ( 0.55 - 1.09 )                      | 47 / 115                               | 0.65 ( 0.41 - 1.04 )                      |                                                                                             |
|                                          |            |                            | 134,699 to <757,550                  | 222 / 267                                                       | 1.20 ( 0.84 - 1.70 )                      | 96 / 93                                | 1.48 ( 0.96 - 2.27 )                      |                                                                                             |
|                                          |            |                            | 757,550+                             | 350 / 128                                                       | 2.91 ( 1.98 - 4.27 )                      | 154 / 44                               | 4.00 ( 2.48 - 6.46 )                      |                                                                                             |
|                                          | rs2070424  | A/G                        | never drinkers                       | 95 / 238                                                        | 1.00 (ref)                                | 22 / 42                                | 1.17 ( 0.63 - 2.17 )                      | 0.01                                                                                        |
|                                          |            |                            | >0 to <134,699                       | 181 / 402                                                       | 0.78 ( 0.56 - 1.08 )                      | 28 / 64                                | 0.76 ( 0.44 - 1.30 )                      |                                                                                             |
|                                          |            |                            | 134,699 to <757,550                  | 260 / 302                                                       | 1.31 ( 0.94 - 1.83 )                      | 58 / 58                                | 1.41 ( 0.87 - 2.30 )                      |                                                                                             |
|                                          |            |                            | 757,550+                             | 407 / 139                                                       | 3.27 ( 2.27 - 4.72 )                      | 98 / 34                                | 3.45 ( 2.06 - 5.79 )                      |                                                                                             |

**Table S4. Odds ratios for developing SCCHN for SNP genotypes, at varying levels of lifetime alcohol consumption**

| Gene        | SNP       | major/<br>minor<br>alleles | lifetime ethanol<br>consumption (ml) | Odds ratios in comparison to common referent group <sup>a</sup> |                                           |                                        |                                           | Assessment of<br>additive interaction<br>between SNP and<br>lifetime alcohol<br>consumption |                                                                                                   |
|-------------|-----------|----------------------------|--------------------------------------|-----------------------------------------------------------------|-------------------------------------------|----------------------------------------|-------------------------------------------|---------------------------------------------------------------------------------------------|---------------------------------------------------------------------------------------------------|
|             |           |                            |                                      | homozygous major allele                                         |                                           | at least one minor allele              |                                           |                                                                                             | ICR <sup>d</sup><br>( <b>bold</b> if statistically<br>significant after<br>Bonferroni correction) |
|             |           |                            |                                      | n<br>(cases/<br>controls) <sup>b</sup>                          | Adjusted odds ratio <sup>c</sup> (95% CI) | n<br>(cases/<br>controls) <sup>b</sup> | Adjusted odds ratio <sup>c</sup> (95% CI) |                                                                                             |                                                                                                   |
|             | rs1041740 | C/T                        | never drinkers                       | 56 / 156                                                        | 1.00 (ref)                                | 61 / 124                               | 1.43 ( 0.89 - 2.28 )                      | -1.09                                                                                       |                                                                                                   |
|             |           |                            | >0 to <134,699                       | 104 / 239                                                       | 0.89 ( 0.59 - 1.35 )                      | 105 / 227                              | 0.90 ( 0.59 - 1.37 )                      |                                                                                             |                                                                                                   |
|             |           |                            | 134,699 to <757,550                  | 193 / 191                                                       | 1.71 ( 1.13 - 2.59 )                      | 125 / 169                              | 1.33 ( 0.86 - 2.05 )                      |                                                                                             |                                                                                                   |
|             |           |                            | 757,550+                             | 291 / 94                                                        | 4.15 ( 2.65 - 6.49 )                      | 214 / 79                               | 3.49 ( 2.21 - 5.52 )                      |                                                                                             |                                                                                                   |
| <b>SOD2</b> | rs4342445 | G/A                        | never drinkers                       | 55 / 177                                                        | 1.00 (ref)                                | 62 / 103                               | 2.14 ( 1.33 - 3.44 )                      | 0.27                                                                                        |                                                                                                   |
|             |           |                            | >0 to <134,699                       | 135 / 296                                                       | 1.10 ( 0.74 - 1.63 )                      | 74 / 170                               | 0.96 ( 0.62 - 1.49 )                      |                                                                                             |                                                                                                   |
|             |           |                            | 134,699 to <757,550                  | 184 / 227                                                       | 1.61 ( 1.07 - 2.40 )                      | 134 / 133                              | 2.11 ( 1.38 - 3.24 )                      |                                                                                             |                                                                                                   |
|             |           |                            | 757,550+                             | 331 / 123                                                       | 4.04 ( 2.65 - 6.17 )                      | 174 / 50                               | 5.45 ( 3.33 - 8.90 )                      |                                                                                             |                                                                                                   |
|             | rs2842980 | A/T                        | never drinkers                       | 74 / 169                                                        | 1.00 (ref)                                | 43 / 111                               | 0.87 ( 0.54 - 1.41 )                      | 0.89                                                                                        |                                                                                                   |
|             |           |                            | >0 to <134,699                       | 121 / 282                                                       | 0.69 ( 0.47 - 1.01 )                      | 88 / 184                               | 0.76 ( 0.50 - 1.14 )                      |                                                                                             |                                                                                                   |
|             |           |                            | 134,699 to <757,550                  | 196 / 222                                                       | 1.27 ( 0.87 - 1.87 )                      | 122 / 138                              | 1.15 ( 0.76 - 1.74 )                      |                                                                                             |                                                                                                   |
|             |           |                            | 757,550+                             | 291 / 108                                                       | 2.77 ( 1.84 - 4.19 )                      | 214 / 65                               | 3.54 ( 2.25 - 5.56 )                      |                                                                                             |                                                                                                   |
|             | rs8031    | T/A                        | never drinkers                       | 38 / 75                                                         | 1.00 (ref)                                | 79 / 205                               | 0.84 ( 0.51 - 1.40 )                      | -0.97                                                                                       |                                                                                                   |
|             |           |                            | >0 to <134,699                       | 59 / 139                                                        | 0.58 ( 0.34 - 0.98 )                      | 150 / 327                              | 0.71 ( 0.44 - 1.15 )                      |                                                                                             |                                                                                                   |
|             |           |                            | 134,699 to <757,550                  | 101 / 113                                                       | 1.14 ( 0.68 - 1.93 )                      | 217 / 247                              | 1.15 ( 0.71 - 1.86 )                      |                                                                                             |                                                                                                   |
|             |           |                            | 757,550+                             | 155 / 40                                                        | 3.73 ( 2.08 - 6.71 )                      | 350 / 133                              | 2.61 ( 1.59 - 4.30 )                      |                                                                                             |                                                                                                   |
| rs5746134   | C/T       | never drinkers             | 113 / 264                            | 1.00 (ref)                                                      | 4 / 16                                    | 0.55 ( 0.16 - 1.87 )                   | 4.29                                      |                                                                                             |                                                                                                   |
|             |           | >0 to <134,699             | 201 / 447                            | 0.73 ( 0.54 - 0.99 )                                            | 8 / 19                                    | 0.80 ( 0.31 - 2.08 )                   |                                           |                                                                                             |                                                                                                   |
|             |           | 134,699 to <757,550        | 299 / 342                            | 1.25 ( 0.91 - 1.71 )                                            | 19 / 18                                   | 1.47 ( 0.68 - 3.18 )                   |                                           |                                                                                             |                                                                                                   |
|             |           | 757,550+                   | 446 / 163                            | 2.96 ( 2.09 - 4.19 )                                            | 59 / 10                                   | 6.80 ( 3.03 - 15.26 )                  |                                           |                                                                                             |                                                                                                   |
| rs2758331   | C/A       | never drinkers             | 38 / 82                              | 1.00 (ref)                                                      | 79 / 198                                  | 0.92 ( 0.55 - 1.52 )                   | -1.51                                     |                                                                                             |                                                                                                   |
|             |           | >0 to <134,699             | 60 / 151                             | 0.58 ( 0.34 - 0.98 )                                            | 149 / 315                                 | 0.78 ( 0.48 - 1.24 )                   |                                           |                                                                                             |                                                                                                   |
|             |           | 134,699 to <757,550        | 108 / 127                            | 1.14 ( 0.68 - 1.90 )                                            | 210 / 233                                 | 1.26 ( 0.78 - 2.03 )                   |                                           |                                                                                             |                                                                                                   |
|             |           | 757,550+                   | 179 / 44                             | 4.23 ( 2.39 - 7.50 )                                            | 326 / 129                                 | 2.64 ( 1.61 - 4.34 )                   |                                           |                                                                                             |                                                                                                   |

<sup>a</sup> Conditional logistic regression models conditioned on sex, race, and age category (age in years: 20-49, 50-54, 55-59, 60-64, 65-69, 70-74, 75-80), and adjusted for continuous duration of smoking in years (rounded to nearest whole year)

<sup>b</sup> Cases and controls do not sum to 1227 and 1325, respectively, because (1) 4 cases and 3 controls are missing information on duration of cigarette smoking, (2) 77 cases and 45 controls are missing information on lifetime alcohol consumption, and (3) a few subjects are missing genotype information for some SNPs

<sup>c</sup> Odds ratios (ORs) for each SNP\*drinking category were calculated from conditional logistic regression models including one SNP coded for dominant genetic model, categorized lifetime ethanol consumption, conditioned on sex, race, and age category, and adjusted for continuous smoking duration rounded to whole years.

<sup>d</sup> ICRs were calculated using cancer odds ratios of subjects in three categories: (1) the highest drinking category and no minor allele (i.e., those singly exposed to drinking only -- OR<sub>01</sub>); (2) never-drinkers with at least one minor allele (i.e., those singly exposed to only the variant allele -- OR<sub>10</sub>); and (3) subjects in the highest drinking category and at least one minor allele (i.e., those doubly exposed to both alcohol and the variant allele -- OR<sub>11</sub>), compared to never-drinkers homozygous for the major allele (i.e., the referent group that was not exposed to either the variant allele or to drinking -- OR<sub>00</sub> = 1.0). ICRs statistically different from 0 indicate departure from additive interaction. p-values for each ICR (not shown) were Bonferroni-adjusted for 64 statistical tests.

**Table S5. SNP effects (dominant genetic model) on odds of developing SCCHN, overall and by race**

(Odds ratios (ORs) for carriers of the minor allele compared to homozygotes for the major allele)

| Gene                            | SNP <sup>1</sup> | major/<br>minor alleles | Genotype  | ALL SUBJECTS COMBINED             |                                      |                                                       | AFRICAN-AMERICANS ONLY            |                                      |                                                       | EUROPEAN-AMERICANS ONLY           |                                      |                                                       |
|---------------------------------|------------------|-------------------------|-----------|-----------------------------------|--------------------------------------|-------------------------------------------------------|-----------------------------------|--------------------------------------|-------------------------------------------------------|-----------------------------------|--------------------------------------|-------------------------------------------------------|
|                                 |                  |                         |           | n cases/<br>controls <sup>2</sup> | Adjusted OR <sup>3</sup><br>(95% CI) | p-value<br>(Bonferroni-<br>corrected for<br>64 tests) | n cases/<br>controls <sup>4</sup> | Adjusted OR <sup>3</sup><br>(95% CI) | p-value<br>(Bonferroni-<br>corrected for<br>64 tests) | n cases/<br>controls <sup>5</sup> | Adjusted OR <sup>3</sup><br>(95% CI) | p-value<br>(Bonferroni-<br>corrected for<br>64 tests) |
| <b>ALCOHOL METABOLISM GENES</b> |                  |                         |           |                                   |                                      |                                                       |                                   |                                      |                                                       |                                   |                                      |                                                       |
| ADH1B                           | rs12507573       | C/A                     | CC        | 371/386                           |                                      |                                                       | 99/83                             |                                      |                                                       | 272/303                           |                                      |                                                       |
|                                 |                  |                         | AA or CA  | 852/935                           | 0.96 (0.87-1.06)                     | 1.00                                                  | 204/167                           | 1.05 (0.67-1.64)                     | 1.00                                                  | 648/768                           | 0.89 (0.72-1.11)                     | 1.00                                                  |
|                                 | rs1042026        | A/G                     | AA        | 712/744                           |                                      |                                                       | 246/210                           |                                      |                                                       | 466/534                           |                                      |                                                       |
|                                 |                  |                         | GG or AG  | 511/578                           | 1.00 (0.91-1.10)                     | 1.00                                                  | 57/41                             | 0.90 (0.51-1.58)                     | 1.00                                                  | 454/537                           | 0.99 (0.82-1.20)                     | 1.00                                                  |
|                                 | rs7673353        | C/T                     | CC        | 1124/1239                         |                                      |                                                       | 207/174                           |                                      |                                                       | 917/1065                          |                                      |                                                       |
|                                 |                  |                         | TT or CT  | 99/83                             | 1.01 (0.83-1.23)                     | 1.00                                                  | 96/77                             | 1.16 (0.73-1.85)                     | 1.00                                                  | 3/6                               | 0.35 (0.08-1.48)                     | 1.00                                                  |
|                                 | rs17028834       | T/C                     | TT        | 1138/1265                         |                                      |                                                       | 222/196                           |                                      |                                                       | 916/1069                          |                                      |                                                       |
|                                 |                  |                         | CC or TC  | 85/57                             | 1.28 (1.03-1.59)                     | 1.00                                                  | 81/55                             | 1.92 (1.14-3.21)                     | 0.88                                                  | 4/2                               | 3.02 (0.48-18.98)                    | 1.00                                                  |
|                                 | rs1693457        | T/C                     | TT        | 803/860                           |                                      |                                                       | 208/148                           |                                      |                                                       | 595/712                           |                                      |                                                       |
|                                 |                  |                         | CC or TC  | 419/461                           | 1.01 (0.92-1.11)                     | 1.00                                                  | 95/102                            | 0.64 (0.41-0.99)                     | 1.00                                                  | 324/359                           | 1.15 (0.94-1.41)                     | 1.00                                                  |
| tag SNP, intron 4               | rs1229984        | G/A                     | GG        | 1192/1243                         |                                      |                                                       | 302/246                           |                                      |                                                       | 890/997                           |                                      |                                                       |
|                                 |                  |                         | AA or GA  | 31/79                             | 0.72 (0.57-0.91)                     | 0.35                                                  | 1/5                               | 0.12 (0.01-1.24)                     | 1.00                                                  | 30/74                             | 0.54 (0.34-0.87)                     | 0.69                                                  |
| rs1159918                       | G/T              | GG                      | 402/468   |                                   |                                      | 28/18                                                 |                                   |                                      | 374/450                                               |                                   |                                      |                                                       |
|                                 |                  | TT or GT                | 821/854   | 1.07 (0.97-1.18)                  | 1.00                                 | 275/233                                               | 1.39 (0.66-2.92)                  | 1.00                                 | 546/621                                               | 1.14 (0.94-1.39)                  | 1.00                                 |                                                       |
| rs1229982                       | G/T              | GG                      | 699/775   |                                   |                                      | 89/75                                                 |                                   |                                      | 610/700                                               |                                   |                                      |                                                       |
|                                 |                  | TT or GT                | 524/547   | 1.00 (0.91-1.10)                  | 1.00                                 | 214/176                                               | 1.33 (0.84-2.10)                  | 1.00                                 | 310/371                                               | 0.96 (0.78-1.17)                  | 1.00                                 |                                                       |
| ADH1C                           | rs2298753        | T/C                     | TT        | 1002/1117                         |                                      |                                                       | 283/237                           |                                      |                                                       | 719/880                           |                                      |                                                       |
|                                 |                  |                         | CC or TC  | 221/205                           | 1.12 (1.00-1.27)                     | 1.00                                                  | 20/14                             | 1.13 (0.46-2.77)                     | 1.00                                                  | 201/191                           | 1.28 (1.00-1.63)                     | 1.00                                                  |
|                                 | rs1614972        | C/T                     | CC        | 539/585                           |                                      |                                                       | 94/55                             |                                      |                                                       | 445/530                           |                                      |                                                       |
|                                 |                  |                         | TT or CT  | 684/737                           | 1.00 (0.92-1.09)                     | 1.00                                                  | 209/196                           | 0.74 (0.46-1.20)                     | 1.00                                                  | 475/541                           | 1.07 (0.88-1.29)                     | 1.00                                                  |
|                                 | rs1391088        | C/A                     | CC        | 1045/1119                         |                                      |                                                       | 246/213                           |                                      |                                                       | 799/906                           |                                      |                                                       |
|                                 |                  |                         | AA or CA  | 178/203                           | 1.01 (0.89-1.14)                     | 1.00                                                  | 57/38                             | 1.55 (0.87-2.77)                     | 1.00                                                  | 121/165                           | 0.91 (0.69-1.21)                     | 1.00                                                  |
| rs1693482                       | C/T              | CC                      | 527/585   |                                   |                                      | 203/183                                               |                                   |                                      | 324/402                                               |                                   |                                      |                                                       |
|                                 |                  | TT or CT                | 694/735   | 1.05 (0.95-1.15)                  | 1.00                                 | 100/68                                                | 1.32 (0.83-2.12)                  | 1.00                                 | 594/667                                               | 1.05 (0.86-1.29)                  | 1.00                                 |                                                       |
| rs1631460                       | C/G              | CC                      | 519/574   |                                   |                                      | 202/182                                               |                                   |                                      | 317/392                                               |                                   |                                      |                                                       |
|                                 |                  | GG or CG                | 703/748   | 1.04 (0.95-1.14)                  | 1.00                                 | 101/69                                                | 1.31 (0.82-2.09)                  | 1.00                                 | 602/679                                               | 1.05 (0.86-1.28)                  | 1.00                                 |                                                       |
| rs11936869                      | C/G              | CC                      | 611/645   |                                   |                                      | 109/72                                                |                                   |                                      | 502/573                                               |                                   |                                      |                                                       |
|                                 |                  | GG or CG                | 612/676   | 0.98 (0.90-1.07)                  | 1.00                                 | 194/178                                               | 0.76 (0.48-1.19)                  | 1.00                                 | 418/498                                               | 1.00 (0.83-1.22)                  | 1.00                                 |                                                       |
| ADH4                            | rs29001227       | A/T                     | AA        | 1119/1253                         |                                      |                                                       | 204/184                           |                                      |                                                       | 915/1069                          |                                      |                                                       |
|                                 |                  |                         | TT or AT  | 104/69                            | 1.25 (1.02-1.53)                     | 1.00                                                  | 99/67                             | 1.70 (1.05-2.73)                     | 1.00                                                  | 5/2                               | 3.42 (0.58-20.22)                    | 1.00                                                  |
|                                 | rs1126672        | C/T                     | CC        | 720/758                           |                                      |                                                       | 237/203                           |                                      |                                                       | 483/555                           |                                      |                                                       |
|                                 |                  |                         | TT or CT  | 503/564                           | 1.01 (0.92-1.10)                     | 1.00                                                  | 66/48                             | 1.45 (0.85-2.49)                     | 1.00                                                  | 437/516                           | 0.98 (0.81-1.19)                     | 1.00                                                  |
|                                 | rs4699710        | T/C                     | TT        | 640/684                           |                                      |                                                       | 200/168                           |                                      |                                                       | 440/516                           |                                      |                                                       |
|                                 |                  |                         | CC or TC  | 583/638                           | 1.01 (0.93-1.11)                     | 1.00                                                  | 103/83                            | 1.10 (0.70-1.74)                     | 1.00                                                  | 480/555                           | 1.02 (0.84-1.24)                     | 1.00                                                  |
|                                 | rs10017466       | T/C                     | TT        | 556/632                           |                                      |                                                       | 120/118                           |                                      |                                                       | 436/514                           |                                      |                                                       |
|                                 |                  |                         | CC or TC  | 666/690                           | 1.05 (0.97-1.15)                     | 1.00                                                  | 182/133                           | 1.65 (1.07-2.55)                     | 1.00                                                  | 484/557                           | 1.04 (0.85-1.26)                     | 1.00                                                  |
| tag SNP, intron 5               | rs1800759        | C/A                     | CC        | 357/412                           |                                      |                                                       | 21/16                             |                                      |                                                       | 336/396                           |                                      |                                                       |
|                                 |                  |                         | AA or CA  | 866/910                           | 1.02 (0.92-1.12)                     | 1.00                                                  | 282/235                           | 1.57 (0.70-3.52)                     | 1.00                                                  | 584/675                           | 1.02 (0.83-1.24)                     | 1.00                                                  |
| rs1800761                       | G/A              | GG                      | 750/830   |                                   |                                      | 153/129                                               |                                   |                                      | 597/701                                               |                                   |                                      |                                                       |
|                                 |                  | AA or GA                | 473/492   | 1.02 (0.93-1.12)                  | 1.00                                 | 150/122                                               | 0.99 (0.64-1.51)                  | 1.00                                 | 323/370                                               | 1.06 (0.86-1.29)                  | 1.00                                 |                                                       |
| rs3762894                       | T/C              | TT                      | 839/906   |                                   |                                      | 190/161                                               |                                   |                                      | 649/745                                               |                                   |                                      |                                                       |
|                                 |                  | CC or TC                | 384/416   | 0.98 (0.89-1.08)                  | 1.00                                 | 113/90                                                | 1.06 (0.68-1.66)                  | 1.00                                 | 271/326                                               | 0.94 (0.76-1.16)                  | 1.00                                 |                                                       |
| ADH7                            | rs284787         | C/T                     | CC        | 739/817                           |                                      |                                                       | 219/188                           |                                      |                                                       | 520/629                           |                                      |                                                       |
|                                 |                  |                         | TT or CT  | 484/505                           | 1.06 (0.96-1.16)                     | 1.00                                                  | 84/63                             | 0.86 (0.54-1.39)                     | 1.00                                                  | 400/442                           | 1.14 (0.94-1.39)                     | 1.00                                                  |
|                                 | rs894369         | C/G                     | CC        | 832/849                           |                                      |                                                       | 219/176                           |                                      |                                                       | 613/673                           |                                      |                                                       |
|                                 |                  |                         | GG or CG  | 391/472                           | 0.92 (0.84-1.01)                     | 1.00                                                  | 84/74                             | 1.09 (0.67-1.76)                     | 1.00                                                  | 307/398                           | 0.82 (0.67-1.00)                     | 1.00                                                  |
|                                 | rs17588403       | T/A                     | TT        | 837/887                           |                                      |                                                       | 233/190                           |                                      |                                                       | 604/697                           |                                      |                                                       |
|                                 |                  |                         | AA or TA  | 386/435                           | 0.96 (0.87-1.05)                     | 1.00                                                  | 70/61                             | 0.78 (0.48-1.29)                     | 1.00                                                  | 316/374                           | 0.95 (0.77-1.16)                     | 1.00                                                  |
|                                 | rs1154454        | T/C                     | TT        | 756/808                           |                                      |                                                       | 110/75                            |                                      |                                                       | 646/733                           |                                      |                                                       |
|                                 |                  |                         | CC or TC  | 467/514                           | 0.94 (0.86-1.04)                     | 1.00                                                  | 193/176                           | 0.68 (0.43-1.08)                     | 1.00                                                  | 274/338                           | 0.94 (0.76-1.16)                     | 1.00                                                  |
|                                 | rs1154456        | T/C                     | TT        | 577/629                           |                                      |                                                       | 209/176                           |                                      |                                                       | 368/453                           |                                      |                                                       |
|                                 |                  |                         | CC or TC  | 646/693                           | 1.03 (0.94-1.13)                     | 1.00                                                  | 94/75                             | 0.90 (0.57-1.43)                     | 1.00                                                  | 552/618                           | 1.10 (0.90-1.34)                     | 1.00                                                  |
|                                 | rs1154460        | G/A                     | GG        | 329/377                           |                                      |                                                       | 70/65                             |                                      |                                                       | 259/312                           |                                      |                                                       |
|                                 |                  |                         | AA or GA  | 891/944                           | 1.04 (0.95-1.15)                     | 1.00                                                  | 233/185                           | 1.11 (0.67-1.82)                     | 1.00                                                  | 658/759                           | 1.08 (0.87-1.34)                     | 1.00                                                  |
| rs971074                        | G/A              | GG                      | 943/1027  |                                   |                                      | 195/176                                               |                                   |                                      | 748/851                                               |                                   |                                      |                                                       |
|                                 |                  | AA or GA                | 280/295   | 1.01 (0.91-1.12)                  | 1.00                                 | 108/75                                                | 1.21 (0.77-1.90)                  | 1.00                                 | 172/220                                               | 0.94 (0.74-1.20)                  | 1.00                                 |                                                       |
| rs1573496                       | C/G              | CC                      | 1056/1117 |                                   |                                      | 296/245                                               |                                   |                                      | 760/872                                               |                                   |                                      |                                                       |
|                                 |                  | GG or CG                | 166/205   | 0.99 (0.87-1.12)                  | 1.00                                 | 7/6                                                   | 0.78 (0.20-3.03)                  | 1.00                                 | 159/199                                               | 0.97 (0.75-1.24)                  | 1.00                                 |                                                       |
| ALDH2                           | rs4767939        | A/G                     | AA        | 694/806                           |                                      |                                                       | 107/88                            |                                      |                                                       | 587/718                           |                                      |                                                       |
|                                 |                  |                         | GG or AG  | 528/516                           | 1.08 (0.98-1.18)                     | 1.00                                                  | 196/163                           | 1.07 (0.69-1.67)                     | 1.00                                                  | 332/353                           | 1.19 (0.97-1.45)                     | 1.00                                                  |
|                                 | rs2238151        | T/C                     | TT        | 364/482                           |                                      |                                                       | 2/1                               |                                      |                                                       | 362/481                           |                                      |                                                       |
|                                 |                  |                         | CC or TC  | 855/837                           | 1.13 (1.03-1.25)                     | 0.84                                                  | 301/250                           | 0.91 (0.06-14.48)                    | 1.00                                                  | 554/587                           | 1.28 (1.05-1.56)                     | 0.88                                                  |

**Table S5. SNP effects (dominant genetic model) on odds of developing SCCHN, overall and by race**

(Odds ratios (ORs) for carriers of the minor allele compared to homozygotes for the major allele)

| Gene                                     | SNP <sup>1</sup> | major/<br>minor alleles | Genotype  | ALL SUBJECTS COMBINED             |                                      |                                                       | AFRICAN-AMERICANS ONLY            |                                      |                                                       | EUROPEAN-AMERICANS ONLY           |                                      |                                                       |
|------------------------------------------|------------------|-------------------------|-----------|-----------------------------------|--------------------------------------|-------------------------------------------------------|-----------------------------------|--------------------------------------|-------------------------------------------------------|-----------------------------------|--------------------------------------|-------------------------------------------------------|
|                                          |                  |                         |           | n cases/<br>controls <sup>2</sup> | Adjusted OR <sup>3</sup><br>(95% CI) | p-value<br>(Bonferroni-<br>corrected for<br>64 tests) | n cases/<br>controls <sup>4</sup> | Adjusted OR <sup>3</sup><br>(95% CI) | p-value<br>(Bonferroni-<br>corrected for<br>64 tests) | n cases/<br>controls <sup>5</sup> | Adjusted OR <sup>3</sup><br>(95% CI) | p-value<br>(Bonferroni-<br>corrected for<br>64 tests) |
| CYP2E1                                   | rs7312055        | G/A                     | GG        | 1081/1201                         |                                      |                                                       | 166/138                           |                                      |                                                       | 915/1063                          |                                      |                                                       |
|                                          |                  |                         | AA or GA  | 142/121                           | 0.93 (0.78-1.12)                     | 1.00                                                  | 137/113                           | 0.82 (0.53-1.26)                     | 1.00                                                  | 5/8                               | 0.74 (0.22-2.54)                     | 1.00                                                  |
|                                          | rs2158029        | G/A                     | GG        | 1166/1269                         |                                      |                                                       | 252/209                           |                                      |                                                       | 914/1060                          |                                      |                                                       |
|                                          |                  |                         | AA or GA  | 57/53                             | 0.95 (0.75-1.19)                     | 1.00                                                  | 51/42                             | 0.95 (0.53-1.69)                     | 1.00                                                  | 6/11                              | 0.55 (0.18-1.66)                     | 1.00                                                  |
|                                          | rs16941667       | C/T                     | CC        | 985/1097                          |                                      |                                                       | 224/188                           |                                      |                                                       | 761/909                           |                                      |                                                       |
|                                          |                  |                         | TT or CT  | 238/224                           | 1.10 (0.98-1.23)                     | 1.00                                                  | 79/62                             | 1.21 (0.75-1.97)                     | 1.00                                                  | 159/162                           | 1.21 (0.93-1.58)                     | 1.00                                                  |
|                                          | rs16941669       | T/G                     | TT        | 984/1084                          |                                      |                                                       | 251/214                           |                                      |                                                       | 733/870                           |                                      |                                                       |
|                                          |                  |                         | GG or TG  | 239/236                           | 1.06 (0.95-1.19)                     | 1.00                                                  | 52/36                             | 1.52 (0.83-2.77)                     | 1.00                                                  | 187/200                           | 1.08 (0.85-1.38)                     | 1.00                                                  |
|                                          | rs3813865        | G/C                     | GG        | 1098/1215                         |                                      |                                                       | 223/195                           |                                      |                                                       | 875/1020                          |                                      |                                                       |
|                                          |                  |                         | CC or GC  | 125/106                           | 1.08 (0.92-1.27)                     | 1.00                                                  | 80/56                             | 1.22 (0.75-2.00)                     | 1.00                                                  | 45/50                             | 1.15 (0.73-1.82)                     | 1.00                                                  |
|                                          | rs3813867        | G/C                     | GG        | 1139/1237                         |                                      |                                                       | 271/224                           |                                      |                                                       | 868/1013                          |                                      |                                                       |
|                                          |                  |                         | CC or GC  | 83/84                             | 0.97 (0.82-1.16)                     | 1.00                                                  | 31/26                             | 1.13 (0.56-2.29)                     | 1.00                                                  | 52/58                             | 0.92 (0.60-1.39)                     | 1.00                                                  |
|                                          | rs8192772        | T/C                     | TT        | 1023/1114                         |                                      |                                                       | 235/196                           |                                      |                                                       | 788/918                           |                                      |                                                       |
|                                          |                  |                         | CC or TC  | 199/208                           | 1.07 (0.95-1.21)                     | 1.00                                                  | 67/55                             | 1.30 (0.77-2.19)                     | 1.00                                                  | 132/153                           | 1.14 (0.86-1.50)                     | 1.00                                                  |
|                                          | rs915908         | G/A                     | GG        | 974/1006                          |                                      |                                                       | 286/228                           |                                      |                                                       | 688/778                           |                                      |                                                       |
|                                          |                  |                         | AA or GA  | 249/316                           | 0.93 (0.84-1.04)                     | 1.00                                                  | 17/23                             | 0.55 (0.24-1.25)                     | 1.00                                                  | 232/293                           | 0.90 (0.72-1.12)                     | 1.00                                                  |
|                                          | rs915909         | C/T                     | CC        | 1164/1271                         |                                      |                                                       | 245/204                           |                                      |                                                       | 919/1067                          |                                      |                                                       |
|                                          |                  |                         | TT or CT  | 58/46                             | 1.00 (0.79-1.27)                     | 1.00                                                  | 57/42                             | 1.08 (0.62-1.88)                     | 1.00                                                  | 1/4                               | 0.22 (0.02-2.17)                     | 1.00                                                  |
| rs7092584                                | C/T              | CC                      | 959/1052  |                                   |                                      | 217/187                                               |                                   |                                      | 742/865                                               |                                   |                                      |                                                       |
|                                          |                  | TT or CT                | 262/269   | 1.05 (0.95-1.17)                  | 1.00                                 | 84/63                                                 | 1.45 (0.89-2.37)                  | 1.00                                 | 178/206                                               | 1.05 (0.82-1.35)                  | 1.00                                 |                                                       |
| rs743535                                 | C/T              | CC                      | 966/1071  |                                   |                                      | 210/188                                               |                                   |                                      | 756/883                                               |                                   |                                      |                                                       |
|                                          |                  | TT or CT                | 248/243   | 1.06 (0.95-1.19)                  | 1.00                                 | 89/61                                                 | 1.46 (0.90-2.37)                  | 1.00                                 | 159/182                                               | 1.05 (0.81-1.36)                  | 1.00                                 |                                                       |
| rs2249695                                | C/T              | CC                      | 622/682   |                                   |                                      | 28/23                                                 |                                   |                                      | 594/659                                               |                                   |                                      |                                                       |
|                                          |                  | TT or CT                | 600/639   | 0.93 (0.85-1.03)                  | 1.00                                 | 275/227                                               | 1.16 (0.55-2.44)                  | 1.00                                 | 325/412                                               | 0.86 (0.70-1.05)                  | 1.00                                 |                                                       |
| rs28969387                               | A/T              | AA                      | 1198/1302 |                                   |                                      | 280/231                                               |                                   |                                      | 918/1071                                              |                                   |                                      |                                                       |
|                                          |                  | TT or AT                | 25/20     | 0.98 (0.70-1.37)                  | 1.00                                 | 23/20                                                 | 0.82 (0.37-1.78)                  | 1.00                                 | 2/0                                                   | N/A                               | 1.00                                 |                                                       |
| rs11101812                               | T/C              | TT                      | 1194/1300 |                                   |                                      | 277/230                                               |                                   |                                      | 917/1070                                              |                                   |                                      |                                                       |
|                                          |                  | CC or TC                | 26/20     | 1.11 (0.79-1.56)                  | 1.00                                 | 24/19                                                 | 1.19 (0.52-2.72)                  | 1.00                                 | 2/1                                                   | 2.97 (0.20-44.70)                 | 1.00                                 |                                                       |
| <b>OXIDATIVE STRESS METABOLISM GENES</b> |                  |                         |           |                                   |                                      |                                                       |                                   |                                      |                                                       |                                   |                                      |                                                       |
| CAT                                      | rs1049982        | C/T                     | CC        | 521/589                           |                                      |                                                       | 92/76                             |                                      |                                                       | 429/513                           |                                      |                                                       |
|                                          |                  |                         | TT or CT  | 700/726                           | 1.02 (0.93-1.11)                     | 1.00                                                  | 211/173                           | 0.93 (0.59-1.49)                     | 1.00                                                  | 489/553                           | 1.05 (0.86-1.27)                     | 1.00                                                  |
| GPX1                                     | rs8179172        | T/A                     | TT        | 1172/1271                         |                                      |                                                       | 253/202                           |                                      |                                                       | 919/1069                          |                                      |                                                       |
|                                          |                  |                         | AA or TA  | 51/51                             | 0.92 (0.73-1.17)                     | 1.00                                                  | 50/49                             | 0.88 (0.51-1.52)                     | 1.00                                                  | 1/2                               | 0.27 (0.02-3.00)                     | 1.00                                                  |
|                                          | rs1800668        | C/T                     | CC        | 635/672                           |                                      |                                                       | 173/140                           |                                      |                                                       | 462/532                           |                                      |                                                       |
|                                          |                  |                         | TT or CT  | 588/646                           | 1.04 (0.95-1.14)                     | 1.00                                                  | 130/110                           | 1.13 (0.74-1.74)                     | 1.00                                                  | 458/536                           | 1.06 (0.88-1.29)                     | 1.00                                                  |
| rs3811699                                | A/G              | AA                      | 609/649   |                                   |                                      | 147/118                                               |                                   |                                      | 462/531                                               |                                   |                                      |                                                       |
|                                          |                  | GG or AG                | 614/673   | 1.04 (0.95-1.13)                  | 1.00                                 | 156/133                                               | 1.19 (0.78-1.82)                  | 1.00                                 | 458/540                                               | 1.05 (0.87-1.28)                  | 1.00                                 |                                                       |
| rs3448                                   | C/T              | CC                      | 648/729   |                                   |                                      | 160/138                                               |                                   |                                      | 488/591                                               |                                   |                                      |                                                       |
|                                          |                  | TT or CT                | 575/593   | 1.03 (0.95-1.13)                  | 1.00                                 | 143/113                                               | 1.07 (0.70-1.64)                  | 1.00                                 | 432/480                                               | 1.06 (0.87-1.29)                  | 1.00                                 |                                                       |
| GPX2                                     | rs11623705       | G/T                     | GG        | 996/1069                          |                                      |                                                       | 288/232                           |                                      |                                                       | 708/837                           |                                      |                                                       |
|                                          |                  |                         | TT or GT  | 227/253                           | 1.00 (0.89-1.12)                     | 1.00                                                  | 15/19                             | 0.70 (0.30-1.64)                     | 1.00                                                  | 212/234                           | 1.04 (0.83-1.31)                     | 1.00                                                  |
|                                          | rs2412065        | G/C                     | GG        | 694/733                           |                                      |                                                       | 101/85                            |                                      |                                                       | 593/648                           |                                      |                                                       |
|                                          |                  |                         | CC or GC  | 529/589                           | 0.94 (0.86-1.03)                     | 1.00                                                  | 202/166                           | 1.15 (0.73-1.80)                     | 1.00                                                  | 327/423                           | 0.85 (0.69-1.03)                     | 1.00                                                  |
| rs2737844                                | C/T              | CC                      | 493/511   |                                   |                                      | 13/14                                                 |                                   |                                      | 480/497                                               |                                   |                                      |                                                       |
| tag SNP, intron 1                        |                  | TT or CT                | 725/806   | 0.89 (0.81-0.99)                  | 1.00                                 | 289/237                                               | 2.15 (0.85-5.46)                  | 1.00                                 | 436/569                                               | 0.78 (0.64-0.94)                  | 0.73                                 |                                                       |
| GPX4                                     | rs757229         | G/C                     | GG        | 300/358                           |                                      |                                                       | 55/42                             |                                      |                                                       | 245/316                           |                                      |                                                       |
|                                          |                  |                         | CC or GC  | 922/963                           | 1.03 (0.93-1.14)                     | 1.00                                                  | 247/209                           | 0.71 (0.41-1.26)                     | 1.00                                                  | 675/754                           | 1.13 (0.91-1.40)                     | 1.00                                                  |
| SOD1                                     | rs11910115       | A/C                     | AA        | 1161/1257                         |                                      |                                                       | 242/187                           |                                      |                                                       | 919/1070                          |                                      |                                                       |
|                                          |                  |                         | CC or AC  | 62/65                             | 0.93 (0.74-1.17)                     | 1.00                                                  | 61/64                             | 0.93 (0.55-1.56)                     | 1.00                                                  | 1/1                               | 0.76 (0.03-17.42)                    | 1.00                                                  |
|                                          | rs4998557        | G/A                     | GG        | 829/959                           |                                      |                                                       | 126/100                           |                                      |                                                       | 703/859                           |                                      |                                                       |
|                                          |                  |                         | AA or GA  | 393/360                           | 1.09 (0.99-1.21)                     | 1.00                                                  | 177/151                           | 0.80 (0.52-1.24)                     | 1.00                                                  | 216/209                           | 1.33 (1.05-1.68)                     | 1.00                                                  |
|                                          | rs10432782       | T/G                     | TT        | 874/992                           |                                      |                                                       | 171/130                           |                                      |                                                       | 703/862                           |                                      |                                                       |
|                                          |                  |                         | GG or TG  | 348/329                           | 1.07 (0.97-1.18)                     | 1.00                                                  | 132/121                           | 0.65 (0.42-1.00)                     | 1.00                                                  | 216/208                           | 1.35 (1.07-1.71)                     | 0.82                                                  |
| rs2070424                                | A/G              | AA                      | 1003/1120 |                                   |                                      | 215/167                                               |                                   |                                      | 788/953                                               |                                   |                                      |                                                       |
| tag SNP, intron 3                        |                  | GG or AG                | 220/202   | 1.06 (0.94-1.20)                  | 1.00                                 | 88/84                                                 | 0.52 (0.33-0.83)                  | 0.36                                 | 132/118                                               | 1.47 (1.10-1.97)                  | 0.58                                 |                                                       |
| SOD2                                     | rs1041740        | C/T                     | CC        | 682/705                           |                                      |                                                       | 236/205                           |                                      |                                                       | 446/500                           |                                      |                                                       |
|                                          |                  |                         | TT or CT  | 541/617                           | 0.98 (0.90-1.07)                     | 1.00                                                  | 67/46                             | 1.19 (0.70-2.02)                     | 1.00                                                  | 474/571                           | 0.92 (0.76-1.12)                     | 1.00                                                  |
|                                          | rs4342445        | G/A                     | GG        | 752/850                           |                                      |                                                       | 229/188                           |                                      |                                                       | 523/662                           |                                      |                                                       |
|                                          |                  |                         | AA or GA  | 471/472                           | 1.11 (1.02-1.22)                     | 1.00                                                  | 74/63                             | 1.11 (0.68-1.82)                     | 1.00                                                  | 397/409                           | 1.27 (1.04-1.54)                     | 1.00                                                  |
| rs2842980                                | A/T              | AA                      | 715/807   |                                   |                                      | 136/135                                               |                                   |                                      | 579/672                                               |                                   |                                      |                                                       |
|                                          |                  | TT or AT                | 508/515   | 1.02 (0.94-1.12)                  | 1.00                                 | 167/116                                               | 1.53 (1.00-2.35)                  | 1.00                                 | 341/399                                               | 0.96 (0.79-1.18)                  | 1.00                                 |                                                       |
| rs8031                                   | T/A              | TT                      | 387/382   |                                   |                                      | 138/109                                               |                                   |                                      | 249/273                                               |                                   |                                      |                                                       |
|                                          |                  | AA or TA                | 836/940   | 0.98 (0.89-1.08)                  | 1.00                                 | 165/142                                               | 1.01 (0.66-1.55)                  | 1.00                                 | 671/798                                               | 0.96 (0.77-1.20)                  | 1.00                                 |                                                       |

**Table S5. SNP effects (dominant genetic model) on odds of developing SCCHN, overall and by race**

(Odds ratios (ORs) for carriers of the minor allele compared to homozygotes for the major allele)

| Gene | SNP <sup>1</sup> | major/<br>minor alleles | Genotype | ALL SUBJECTS COMBINED             |                                      |                                                       | AFRICAN-AMERICANS ONLY            |                                      |                                                       | EUROPEAN-AMERICANS ONLY           |                                      |                                                       |
|------|------------------|-------------------------|----------|-----------------------------------|--------------------------------------|-------------------------------------------------------|-----------------------------------|--------------------------------------|-------------------------------------------------------|-----------------------------------|--------------------------------------|-------------------------------------------------------|
|      |                  |                         |          | n cases/<br>controls <sup>2</sup> | Adjusted OR <sup>3</sup><br>(95% CI) | p-value<br>(Bonferroni-<br>corrected<br>for 64 tests) | n cases/<br>controls <sup>4</sup> | Adjusted OR <sup>3</sup><br>(95% CI) | p-value<br>(Bonferroni-<br>corrected for<br>64 tests) | n cases/<br>controls <sup>5</sup> | Adjusted OR <sup>3</sup><br>(95% CI) | p-value<br>(Bonferroni-<br>corrected<br>for 64 tests) |
|      | <b>rs5746134</b> | C/T                     | CC       | 1125/1257                         |                                      |                                                       | 205/190                           |                                      |                                                       | 920/1067                          |                                      |                                                       |
|      |                  |                         | TT or CT | 98/65                             | 1.20 (0.98-1.48)                     | 1.00                                                  | 98/61                             | 1.66 (1.02-2.70)                     | 1.00                                                  | 0/4                               | N/A                                  | 1.00                                                  |
|      | <i>rs2758331</i> | C/A                     | CC       | 422/419                           |                                      |                                                       | 172/146                           |                                      |                                                       | 250/273                           |                                      |                                                       |
|      |                  |                         | AA or CA | 801/903                           | 0.99 (0.90-1.09)                     | 1.00                                                  | 131/105                           | 1.13 (0.74-1.73)                     | 1.00                                                  | 670/798                           | 0.95 (0.76-1.18)                     | 1.00                                                  |

<sup>1</sup> Two SNP names highlighted in **bold** show strong evidence of OR differences between African-Americans and European-Americans using the criterion of non-overlapping 95% CIs. Four SNP names highlighted in *italics* show some evidence of OR differences between African- and European-Americans, but 95% CIs overlap somewhat

<sup>2</sup> Cases and controls do not sum to 1227 and 1325, respectively, because 4 cases and 3 controls are missing information on duration of cigarette smoking, and a few subjects lack genotype information for some SNPs

<sup>3</sup> Conditional logistic regression models for calculating main effects of each SNP were conditioned on sex, race, and age category, and adjusted for continuous duration of smoking in years (rounded to whole years)

<sup>4</sup> Numbers of African-American subjects do not sum to 305 cases and 251 controls, respectively, because 2 cases are missing information on duration of cigarette smoking, and a few subjects lack genotype information for some SNPs.

<sup>5</sup> Numbers of European-American subjects do not sum to 922 cases and 1074 controls, respectively, because 2 cases and 3 controls are missing information on duration of cigarette smoking, and a few subjects lack genotype information for some SNPs.
